# Supplementary material for: Effect of adherence to the first-generation injectable immunomodulatory drugs on disability accumulation in multiple sclerosis: a longitudinal cohort study
Source: PubMed Central journal article supplement — BMJ Open. 2017 Sep 29;7(9):e018612. doi: 10.1136/bmjopen-2017-018612 (PMC5640095; doi:10.1136/bmjopen-2017-018612), 2017-09-29
Supplement: bmjopen-2017-018612.draft_revisions.pdf [file bmjopen-2017-018612.draft_revisions.pdf]

# BMJ Open

BMJ Open is committed to open peer review. As part of this commitment we make the peer review history of every article we publish publicly available.

When an article is published we post the peer reviewers' comments and the authors' responses online. We also post the versions of the paper that were used during peer review. These are the versions that the peer review comments apply to.

The versions of the paper that follow are the versions that were submitted during the peer review process. They are not the versions of record or the final published versions. They should not be cited or distributed as the published version of this manuscript.

BMJ Open is an open access journal and the full, final, typeset and author-corrected version of record of the manuscript is available on our site with no access controls, subscription charges or pay-per-view fees (<http://bmjopen.bmj.com>).

If you have any questions on BMJ Open's open peer review process please email [editorial.bmjopen@bmj.com](mailto:editorial.bmjopen@bmj.com)

# BMJ Open

## Effect of adherence to the first-generation injectable immunomodulatory drugs on disability accumulation in multiple sclerosis

|                                    |                                                                                                                                                                                                                                                                                                                                                                                                                                                                                                                                                                                                                      |
|------------------------------------|----------------------------------------------------------------------------------------------------------------------------------------------------------------------------------------------------------------------------------------------------------------------------------------------------------------------------------------------------------------------------------------------------------------------------------------------------------------------------------------------------------------------------------------------------------------------------------------------------------------------|
| Journal:                           | <i>BMJ Open</i>                                                                                                                                                                                                                                                                                                                                                                                                                                                                                                                                                                                                      |
| Manuscript ID                      | bmjopen-2017-018612                                                                                                                                                                                                                                                                                                                                                                                                                                                                                                                                                                                                  |
| Article Type:                      | Research                                                                                                                                                                                                                                                                                                                                                                                                                                                                                                                                                                                                             |
| Date Submitted by the Author:      | 10-Jul-2017                                                                                                                                                                                                                                                                                                                                                                                                                                                                                                                                                                                                          |
| Complete List of Authors:          | Zhang, Tingting; Brown University School of Public Health<br>Kingwell, Elaine; University of British Columbia Faculty of Medicine<br>Zhu, Feng; University of British Columbia Faculty of Medicine<br>Petkau, John ; University of British Columbia, Department of Statistics<br>Kastrukoff, Lorne; University of British Columbia, Medicine<br>Marrie, Ruth; University of Manitoba, Departments of Internal Medicine and<br>Community Health Sciences<br>Tremlett, Helen; University Of British Columbia, Medicine (Neurology)<br>Evans, Charity; University of Saskatchewan, College of Pharmacy and<br>Nutrition |
| <b>Primary Subject<br>Heading</b>: | Neurology                                                                                                                                                                                                                                                                                                                                                                                                                                                                                                                                                                                                            |
| Secondary Subject Heading:         | Pharmacology and therapeutics                                                                                                                                                                                                                                                                                                                                                                                                                                                                                                                                                                                        |
| Keywords:                          | Multiple sclerosis < NEUROLOGY, Adherence, Disease progression,<br>Immunomodulatory drugs                                                                                                                                                                                                                                                                                                                                                                                                                                                                                                                            |
|                                    |                                                                                                                                                                                                                                                                                                                                                                                                                                                                                                                                                                                                                      |

SCHOLARONE™  
Manuscripts

1  
2  
3 **Effect of adherence to the first-generation injectable immunomodulatory drugs on**  
4 **disability accumulation in multiple sclerosis**  
5  
6  
7  
8  
9

10 Tingting Zhang<sup>1</sup>, MD, PhD; Elaine Kingwell<sup>2</sup>, PhD; Feng Zhu<sup>2</sup>, MSc; John Petkau<sup>3</sup>, PhD; Lorne  
11 F. Kastrukoff<sup>2</sup>, MD; Ruth Ann Marrie<sup>4</sup>, MD, PhD; Helen Tremlett<sup>2</sup>, PhD; Charity Evans<sup>5</sup>, PhD  
12  
13  
14

15  
16  
17 **Affiliations:**  
18

19  
20 <sup>1</sup>Department of Health Services, Policy & Practice, Brown University School of Public Health,  
21 Providence, United States  
22  
23

24  
25 <sup>2</sup>Department of Medicine (Neurology) and the Centre for Brain Health, University of British  
26 Columbia, Canada  
27  
28

29  
30 <sup>3</sup>Department of Statistics, University of British Columbia, Canada  
31

32  
33 <sup>4</sup>Departments of Internal Medicine and Community Health Sciences, Max Rady College of  
34 Medicine, Rady Faculty of Health Sciences, University of Manitoba, Winnipeg, Canada  
35

36  
37 <sup>5</sup>College of Pharmacy and Nutrition, University of Saskatchewan, Saskatoon, Canada  
38  
39  
40

41 **Corresponding author:**  
42

43 Charity Evans  
44

45 College of Pharmacy and Nutrition  
46  
47

48 University of Saskatchewan  
49

50 104 Clinic Place  
51

52 Saskatoon, Saskatchewan S7N 2Z4  
53  
54

55 [charity.evans@usask.ca](mailto:charity.evans@usask.ca)  
56  
57

**Word Counts:**

Abstract: 231

Main text: 2,630

Title Characters: 127

References: 40

Tables: 2

Figures: 0

Supplementary document: supplementary methods, Table S1, Table S2 and Figure S1

**ABSTRACT**

**Objective:** To examine the association between optimal adherence to the first-generation injectable immunomodulatory drugs (IMDs) for multiple sclerosis (MS) and subsequent disability accumulation.

**Methods:** We accessed prospectively collected linked clinical and administrative health data from British Columbia, Canada. MS subjects treated with a first-generation injectable IMD at a MS Clinic (1996-2004) were followed until their last clinic visit before 2009. Adherence was estimated using the proportion of days covered (PDC). The primary outcome was disability accumulation, defined as an increase in the Expanded Disability Status Scale (EDSS) score as recorded during each year of follow-up. Generalized estimating equation models, adjusted for baseline sex, age, EDSS and time between scores, were used to measure associations between optimal adherence ( $\geq 80\%$  PDC) during the first year of treatment and subsequent disability accumulation. The relationship between early IMD adherence and the secondary outcome, time to sustained EDSS 6, was examined using Cox proportional hazards regression.

**Results:** Among 801 subjects, 598 (74.7%) had optimal adherence over the first year of IMD treatment and 487 (39.0%) demonstrated one or more instances of disability accumulation. Early optimal adherence was not associated with disability accumulation [adjusted odds ratio (adjOR) 0.94;95%CI:0.78-1.15], nor with time to sustained EDSS 6 (adjOR 0.91;95%CI:0.57-1.44).

**Conclusions:** Almost three-quarters of MS subjects had optimal early adherence to their first-line injectable IMD. There was no evidence that this was associated with disability accumulation in the following years.

**KEYWORDS:** Multiple sclerosis; adherence, immunomodulatory drugs, disease progression, longitudinal analysis, observational study

**STRENGTHS AND LIMITATIONS OF THIS STUDY**

- One of the first population-based studies to examine the association between drug adherence and subsequent disability accumulation in multiple sclerosis
- Real world setting which increases the generalizability of the study results
- Observational studies cannot adjust or assess all potential (unknown) confounders

For peer review only

## INTRODUCTION

Multiple sclerosis (MS) is a chronic inflammatory disease of the central nervous system and is considered one of the most common reasons for non-trauma related disability in young adults.<sup>1</sup>

The injectable immunomodulatory therapies (IMDs), beta-interferon and glatiramer acetate, are associated with reduced MS relapse rates in short-term clinical trials,<sup>2</sup> but the evidence regarding the effects of these therapies on longer-term disability progression drawn from observational studies is mixed.<sup>2,3</sup> These drugs are considered first-line therapies in Canada, and are commonly used to treat MS worldwide.<sup>4</sup>

To maximize the potential benefit of any drug, it should be taken as indicated; however, multiple lifestyle, patient-specific and drug-related factors can affect adherence.<sup>5</sup> Adherence levels early in treatment predict future adherence patterns.<sup>6-8</sup> In general, poor medication adherence is associated with poorer health-related outcomes, including higher risk of morbidity and mortality, increased health services utilization, and increased health care costs.<sup>9-11</sup> In MS, poor adherence to the IMDs is associated with decreased quality of life, higher relapse rates and higher medical costs.<sup>9, 12, 13</sup> However, to date, the effects of IMD adherence on MS progression are unknown. We examined the association between adherence during the initial year of therapy to a first-line injectable IMD and subsequent disability accumulation in people with relapsing-onset MS in British Columbia (BC), Canada.

## METHODS

### *Study design and data sources*

This was a retrospective cohort study, involving linkage of prospectively collected clinical and administrative health data in BC. The BC Multiple Sclerosis (BCMS) database was the source of the MS cohort. This database, established in 1980, captures detailed clinical information on patients registered at one of the four original MS clinics in BC. The BCMS cohort had previously been linked to BC administrative data to the end of 2008; linkage was complete in 2010 at which time all personal identifiers were removed. Routinely collected data include date of MS symptom onset, disease course at onset (relapsing or primary progressive), and level of disability at the time of each clinical assessment as measured by the Expanded Disability Status Scale [EDSS].<sup>14</sup>

British Columbia's comprehensive drug database (PharmaNet)<sup>15</sup> captures >99% of prescriptions dispensed at outpatient and community pharmacies, with data available since January 1<sup>st</sup>, 1996. The Medical Service Plan database contains physician billing records including dates and diagnostic codes for each patient encounter using the International Classification of Disease (ICD), ninth version, and the Discharge Abstracts Database contains hospital admission and discharge dates,<sup>16, 17</sup> and diagnosis codes using ICD ninth version (to 2004) or ICD tenth (from 2005) systems. These databases were used to estimate the comorbidity status of patients. The BC Registration and Premium Billing Files,<sup>18</sup> which include registration dates in the compulsory provincial health care plan, were used to confirm residency during the study period. An estimate of socioeconomic status (SES) was obtained from each individual's postal code and census-derived neighbourhood income data using an algorithm developed by Statistics Canada.<sup>19</sup> A



1  
2  
3 study-specific dataset was created by linking the data at the individual-level using each person's  
4  
5 unique personal health number (a life-long number assigned to every resident of BC). All  
6  
7 personal identifiers were removed before data release and analyses.  
8  
9

10  
11  
12 Ethical approval for this study was granted by the University of British Columbia's Clinical  
13  
14 Research Ethics Board.  
15  
16

### 17 18 19 20 *Study cohort*

21  
22 The study subjects included all persons with MS diagnosed by a MS specialist neurologist<sup>20, 21</sup>  
23  
24 who were registered at a BCMS Clinic before December 31, 2004, and received at least one  
25  
26 prescription dispensation for a first-line injectable IMD between January 1, 1996 and December  
27  
28 31, 2008 as recorded in the provincial prescription database. The only first-line IMDs available  
29  
30 during the study period were interferon-beta-1b, interferon-beta-1a, and glatiramer acetate.  
31  
32  
33

34  
35  
36 Subjects were followed from their index date (date of the first IMD dispensation) until the last  
37  
38 recorded EDSS score before the study end date which was defined as the earlier of: start of a  
39  
40 non-first-line IMD for MS, entry in a MS drug-related clinical trial or December 31, 2008.  
41  
42

43  
44 Subjects were required to have at least one year of residency in BC before the index date (the  
45  
46 'baseline year') and one year of residency between the index date and study end. Subjects were  
47  
48 also required to have at least two recorded EDSS scores; one during the baseline year and one  
49  
50 after the first year of IMD therapy. Because the first IMD for MS was approved for use in  
51  
52 Canada 1995, virtually all of the included subjects were incident (new) users.  
53  
54  
55  
56  
57  
58  
59  
60

### *Study Exposure and Outcome*

In the absence of guidelines for how long an individual should remain on an IMD, or prior studies examining adherence and disability progression, we examined adherence during the first year of therapy. Prior studies have suggested that this first year may be clinically relevant, predicting longer-term response to the IMDs.<sup>22</sup> Adherence was estimated using the proportion of days covered (PDC) measure, calculated as the total number of days of drug dispensed during the one-year period divided by 365 days.<sup>23</sup> All first-line injectable IMDs were considered as one therapeutic group, and switching between these agents was allowed. A PDC of  $\geq 80\%$  indicated 'optimal' adherence, and  $< 80\%$  indicated 'suboptimal' adherence.<sup>24</sup> This threshold was used because it has been associated with health-related outcomes in previous studies, and to allow for comparison with other adherence-related findings.<sup>25, 26</sup>

The outcome of interest was disability accumulation, defined as an increase in the EDSS score of at least:

- (1) 1.5 points if the reference (prior) EDSS was 0<sup>27-29</sup>
- (2) 1 EDSS point if the reference (prior) EDSS was  $\geq 1$  and  $< 5$ <sup>27, 28</sup>
- (3) 0.5 point if the reference (prior) EDSS was  $\geq 5.0$ <sup>27</sup>

Each subject's follow-up period was divided into one year intervals. EDSS scores were examined for each one-year interval (starting during the 2<sup>nd</sup> year after the index date) to determine if disability accumulation had occurred (categorized as 'yes or no') relative to the previous year. The date the EDSS score was recorded within each yearly interval was the 'outcome date' for that interval. If multiple EDSS scores were recorded in a single interval, the

1  
2  
3 highest (and earliest in the case of identical scores) was used. If no EDSS score was recorded in  
4  
5 the reference interval, the score from most recent one year interval with an available EDSS score  
6  
7 was used as the reference (*Figure S1*).  
8  
9

### 10 11 12 *Statistical analyses and model adjustment*

13  
14  
15 The association between IMD adherence and subsequent disability accumulation was examined  
16  
17 using logistic regression models fitted via generalized estimating equations with an exchangeable  
18  
19 working correlation structure.<sup>30</sup> IMD adherence was modeled as a binary variable (optimal vs.  
20  
21 suboptimal). Potential confounders were selected for inclusion in the final models based either  
22  
23 on clinical relevance (baseline sex, age, and EDSS) or association with the outcome ( $p \leq 0.1$  from  
24  
25 univariate analyses).<sup>31</sup> These potential confounders (measured during the baseline year) included:  
26  
27 all prescriptions dispensed (excluding the MS IMDs), grouped according to the Anatomical  
28  
29 Therapeutic Chemical (ATC) Classification System at the fourth level (i.e. pharmacological  
30  
31 subgroup)<sup>32</sup> and categorized as 0-2; 3-4; 5-6 or  $\geq 7$ , comorbidity status measured using Deyo's  
32  
33 adaptation of the Charlson comorbidity index<sup>33</sup> (categorized as 0 or  $\geq 1$ ), and estimated  
34  
35 neighbourhood SES (expressed as quintiles). All models were adjusted for the time between the  
36  
37 reference and outcome EDSS score.  
38  
39  
40  
41  
42  
43  
44  
45  
46

### 47 *Sensitivity and secondary analyses*

48  
49 To fully explore the association between IMD adherence and disability accumulation we  
50  
51 performed three sensitivity analyses and assessed one secondary outcome. For the sensitivity  
52  
53 analyses we first measured disability only over the time period that the subject was 'on drug',  
54  
55 ending follow-up at the last EDSS assessment before the earliest of: IMD discontinuation  
56  
57  
58  
59  
60

Zhang/10

1  
2  
3 (defined as the first day of >180 days with no exposure to a first-line IMD), initiation of a non-  
4 first-line IMD, MS drug clinical trial registration, or December 31, 2008. Second, if multiple  
5 EDSS scores were recorded in a single one-year interval, the lowest, rather than highest, score  
6 was used as the outcome EDSS. Finally, we examined the association between early adherence  
7 and disability accumulation in only those subjects with both reference and outcome EDSS scores  
8 recorded for every year between the index date and study end date (i.e. no EDSS scores were  
9 carried forward as reference values).  
10  
11  
12  
13  
14  
15  
16  
17  
18  
19  
20  
21

22 Our secondary study outcome was time to a confirmed and sustained EDSS score of 6.0. This  
23 outcome, considered as irreversible disability, was achieved when all subsequent EDSS scores  
24 were 6.0 or higher, with at least two records of EDSS 6.0 separated by  $\geq 180$  days, as used  
25 previously.<sup>3</sup> Multivariable Cox proportional hazards models were used to examine the  
26 association between IMD adherence and time to sustained EDSS 6.0, adjusted for potential  
27 confounders (see supplementary methods and Figure S1 for additional details).  
28  
29  
30  
31  
32  
33  
34  
35  
36  
37  
38

39 Statistical analyses were performed using the Statistical Package for the Social Sciences (SPSS),  
40 Version 21.0., IBM Corp. Armonk, NY,<sup>34</sup> and R (Version 3.1.2).<sup>35</sup>  
41  
42  
43  
44

## 45 **RESULTS**

46  
47 A total of 801 subjects were included in the primary analyses with a mean age of 41.5 years, a  
48 mean disease duration of 9.9 years and a median EDSS of 3.0 at the index date. There were a  
49 total of 6,305 person-years of follow-up (mean of 7.9 (SD:2.4) years) (Table 1). Overall, 598  
50  
51  
52  
53  
54  
55  
56  
57  
58  
59  
60

1  
2  
3 subjects (74.7%) had optimal adherence during the first year of therapy, and 487 (39.0%) met the  
4  
5 disability accumulation criterion at least once during follow-up.  
6  
7

8  
9  
10 Socioeconomic status, prescription drug exposure and comorbidity index measures during the  
11  
12 baseline year were not significantly associated with subsequent disability accumulation in the  
13  
14 univariate analyses and were not included in the multivariable models. After adjustment for  
15  
16 baseline sex, age and EDSS, and the amount of time between reference and outcome EDSS  
17  
18 scores, there was no evidence of an association between optimal adherence to a first-line  
19  
20 injectable IMD during the first year of therapy and subsequent disability accumulation [adjusted  
21  
22 odds ratio (adjOR) 0.94; 95% CI 0.78 – 1.15] (Table 2). Compared to women, men were at  
23  
24 greater risk of disability accumulation over the study period (adjOR 1.28 (1.07 – 1.53) (Table 2).  
25  
26  
27  
28  
29

30  
31 Findings from the sensitivity and secondary analyses were consistent with those from the  
32  
33 primary analyses; optimal adherence was not associated with disability accumulation or time to  
34  
35 sustained EDSS 6.0 (adjusted hazard ratio (adjHR) 0.91; 95% CI 0.57 – 1.44) (Tables S1 and S2).  
36  
37  
38  
39  
40  
41  
42

## 43 **DISCUSSION**

44  
45 In this MS cohort, nearly three-quarters of the subjects demonstrated optimal adherence during  
46  
47 the first year of using a first-line injectable IMD therapy. We did not observe a difference in the  
48  
49 odds of disability accumulation for those with optimal IMD adherence in the first year of therapy  
50  
51 compared to those with suboptimal adherence. Similarly, no difference was observed when  
52  
53 disability was assessed as the time to the sustained milestone, EDSS 6.0.  
54  
55  
56  
57  
58  
59  
60

1  
2  
3  
4  
5  
6 Most individuals in our cohort were found to have optimal adherence, which is similar to  
7  
8 adherence levels reported in previous studies.<sup>12, 36</sup> For instance, a study that examined adherence  
9  
10 during the first year of IMD therapy in 2,446 MS patients covered by commercial health plans in  
11  
12 the United States reported that 60% of the cohort had optimal ( $\geq 80\%$ ) adherence.<sup>9</sup> Another  
13  
14 recent study examined adherence in 4,830 individuals with MS using health administrative data  
15  
16 from three provinces in Canada (which included BC). Optimal adherence ( $\geq 80\%$ ) was achieved  
17  
18 in 76% of subjects during the first year of therapy.<sup>36</sup>  
19  
20  
21  
22  
23

24 Previous studies have reported on the effects of IMD adherence on MS patients' quality of life,<sup>10</sup>  
25  
26 medical care costs,<sup>9</sup> and relapse risk,<sup>37</sup> but to our knowledge, no study has examined the  
27  
28 association between IMD adherence and disability accumulation. We did not observe positive  
29  
30 effects of IMD adherence on disability. As it is known that not all individuals respond to beta-  
31  
32 interferon or glatiramer acetate therapy, one potential explanation for this null finding could be  
33  
34 that, optimal adherence is only associated with beneficial effects within certain subgroups of  
35  
36 people with MS. Alternatively, while the first-line injectable IMDs have demonstrated modest  
37  
38 effects on disability accumulation over the short term in clinical trials,<sup>2, 38</sup> it is possible that this  
39  
40 effect does not translate into long-term benefits in real world clinical practice. Although it is not  
41  
42 known how long a person should be on an IMD before gaining benefit, assessment of adherence  
43  
44 over the first year may be insufficient. We specifically assessed adherence in the first year for a  
45  
46 number of reasons. First, others have shown that this initial window may be of clinical relevance,  
47  
48 predicting future response.<sup>22</sup> Second, this method facilitated a degree of separation between the  
49  
50 exposure (adherence) and outcome (disability accumulation). Finally, previous studies have  
51  
52  
53  
54  
55  
56  
57  
58  
59  
60

1  
2  
3 shown that early adherence after drug initiation is predictive of later adherence in some chronic  
4 conditions, including MS.<sup>6-8</sup> One recent study from an American managed care program database  
5 found that adherence over the one year period immediately following IMD initiation predicted  
6 adherence over the subsequent year.<sup>6</sup> Similarly, adherence to statins during the first 4 months  
7 after therapy initiation was shown to predict adherence over the subsequent year in a large North  
8 American population.<sup>7</sup>  
9  
10  
11  
12  
13  
14  
15  
16  
17  
18  
19

20 A major strength of this study is the use of a representative sample of individuals with MS in the  
21 'real-world' setting. Although findings from the short-term clinical trials of the first-generation  
22 IMDs demonstrated modest effects on disability accumulation, clinical trials tend to enrol  
23 participants who are highly selected in terms of age, comorbidities and motivation, and employ  
24 strict protocols for clinical monitoring to prevent or mitigate severe adverse events. Thus, trial  
25 participants may not be fully representative of those treated in clinical practice, such that data on  
26 effectiveness and adherence derived from clinical trial participants may not be generalizable to  
27 the wider MS population. Further strengths include study outcomes (EDSS scores) that were  
28 assigned by the treating MS neurologists during clinic visits, and captured prospectively. Also,  
29 our use of prescription dispensations from administrative data to estimate adherence eliminated  
30 the potential for recall bias. Finally, to test the robustness of our main findings, we examined the  
31 association between IMD adherence and disability accumulation using a variety of approaches,  
32 including a secondary (alternative) outcome. All of the findings from these sensitivity analyses  
33 confirmed that there was no evidence of an association between optimal IMD adherence during  
34 the first treatment year and subsequent disability accumulation.  
35  
36  
37  
38  
39  
40  
41  
42  
43  
44  
45  
46  
47  
48  
49  
50  
51  
52  
53  
54  
55  
56  
57  
58  
59  
60

Zhang/14

1  
2  
3  
4  
5  
6  
7  
8  
9  
10  
11  
12  
13  
14  
15  
16  
17  
18  
19  
20  
21  
22  
23  
24  
25  
26  
27  
28  
29  
30  
31  
32  
33  
34  
35  
36  
37  
38  
39  
40  
41  
42  
43  
44  
45  
46  
47  
48  
49  
50  
51  
52  
53  
54  
55  
56  
57  
58  
59  
60

There are limitations that should be noted. We cannot be certain that a patient who received a dispensation for an IMD actually administered the drug. However, given the high cost of IMDs, the number of patients who actively filled repeated prescriptions for their medications but did not use them is assumed to be negligible. As with all observational studies, we were not able to assess all potential confounders; our data did not include information on lifestyle, such as smoking status or diet, both of which could be associated with IMD adherence and disability accumulation.<sup>39,40</sup> However, we were able to account for disability level and comorbidity burden at baseline, both of which have been linked to IMD adherence and subsequent MS disability accumulation in previous studies.<sup>40</sup> Finally, we used the EDSS to measure disability accumulation. While this is a routine clinical measure and the most widely used and internationally recognized disability assessment tool in MS, it is heavily influenced by ambulation, and does not adequately capture other common MS symptoms such as cognitive deficits and fatigue.

This is the first study to examine the impact of adherence to the first-line injectable IMDs on disability accumulation in MS. Among a cohort of incident users of first-line injectable IMDs, we were unable to find evidence that individuals with MS with optimal adherence during the first year of therapy were at lower odds of disability accumulation compared to those with suboptimal adherence. However, it remains possible that optimal adherence to IMDs positively affect other important outcomes for people with MS that were not considered here, such as quality of life and employment status. Further research examining other relevant MS related outcomes is needed to fully understand the impact of IMD adherence in MS.



1  
2  
3 **Acknowledgements:** We thank the BC Ministry of Health, BC Vital Statistics Agency and BC  
4  
5  
6  
7  
8  
9  
10  
11  
12  
13  
14  
15  
16  
17  
18  
19  
20  
21  
22  
23  
24  
25  
26  
27  
28  
29  
30  
31  
32  
33  
34  
35  
36  
37  
38  
39  
40  
41  
42  
43  
44  
45  
46  
47  
48  
49  
50  
51  
52  
53  
54  
55  
56  
57  
58  
59  
60

**Acknowledgements:** We thank the BC Ministry of Health, BC Vital Statistics Agency and BC PharmaNet for approval and support with accessing provincial data; and Population Data BC for facilitating approval and use of the data.

**Disclaimer:** All inferences, opinions, and conclusions drawn in this study are those of the authors, and do not reflect the opinions or policies of the Data Steward(s).

**Contributorship Statement:** The corresponding author (CE) and the first author (TZ) had access to the data in the study and take responsibility for the integrity of the data and accuracy of the data analyses. CE, EK, HT and TZ designed the study and CE, HT and RAM obtained funding. TZ drafted the manuscript. All authors were involved with the interpretation of the data, critically revising the manuscript, and have approved the final version to be published.

**Competing Interests:** Dr. Zhang, Dr. Kingwell and Mr Zhu declare no conflicts. Dr. Petkau holds research funding from the Natural Sciences and Engineering Research Council of Canada (NSERC), and over the past three years has received consulting fees or fees for service on Data Safety Monitoring Boards from the Canadian Study Group on CCSVI, EMD Serono, Novartis, and Teva Pharmaceuticals Europe. Dr. Kastrukoff has received honoraria or consultation fees from Bayer Healthcare, Biogen Idec, EMD Canada, Genzyme, Merck Serono, Novartis, Hoffmann La-Roche, Teva Canada, and unrestricted travel grants to attend scientific meetings including: the American Academy of Neurology, American Neurological Association, Neuroscience, ECTRIMS, ISNI, and IHW from Bayer Healthcare, BiogenIdec, EMD Serono, Hoffmann La-Roche, Novartis, and Teva Canada. Dr Marrie receives research funding from:

Zhang/16

1  
2  
3 Canadian Institutes of Health Research, Research Manitoba, Multiple Sclerosis Society of  
4  
5 Canada, Multiple Sclerosis Scientific Foundation, National Multiple Sclerosis Society, Rx & D  
6  
7 Health Research Foundation, Crohn's and Colitis Canada, the Consortium of MS Centers, and  
8  
9 has conducted clinical trials funded by Sanofi-Aventis. Dr. Tremlett is the Canada Research  
10  
11 Chair for Neuroepidemiology and Multiple Sclerosis. She currently receives research support  
12  
13 from the National Multiple Sclerosis Society, the Canadian Institutes of Health Research, the  
14  
15 Multiple Sclerosis Society of Canada and the Multiple Sclerosis Scientific Research Foundation.  
16  
17 In addition, in the last five years she has received research support from the Multiple Sclerosis  
18  
19 Society of Canada (Don Paty Career Development Award); the Michael Smith Foundation for  
20  
21 Health Research (Scholar Award) and the UK MS Trust; speaker honoraria and/or travel  
22  
23 expenses to attend conferences from the Consortium of MS Centres (2013), the National MS  
24  
25 Society (2012, 2014, 2016),ECTRIMS (2012, 2013, 2014, 2015, 2016), the Chesapeake Health  
26  
27 Education Program, US Veterans Affairs (2012), Novartis Canada (2012), Biogen Idec (2014),  
28  
29 American Academy of Neurology (2013, 2014, 2015, 2016). All speaker honoraria are either  
30  
31 declined or donated to an MS charity or to an unrestricted grant for use by her research group.  
32  
33  
34  
35  
36  
37  
38  
39 Dr. Evans declares no conflicts.

40  
41  
42  
43 **Funding:** This study was funding by a National Multiple Sclerosis Society Operating Grant(RG-  
44  
45 4757-A-3). Dr Zhang received a Postdoctoral Fellowship from the Multiple Sclerosis Society of  
46  
47 Canada. The study sponsors had no role in the study design, data collection, data analysis,  
48  
49 interpretation of results, writing of this manuscript, or decision to submit. All inferences,  
50  
51 opinions, and conclusions drawn in this publication are those of the authors and do not reflect the  
52  
53  
54  
55  
56  
57  
58  
59  
60

1  
2  
3  
4  
5  
6  
7  
8  
9  
10  
11  
12  
13  
14  
15  
16  
17  
18  
19  
20  
21  
22  
23  
24  
25  
26  
27  
28  
29  
30  
31  
32  
33  
34  
35  
36  
37  
38  
39  
40  
41  
42  
43  
44  
45  
46  
47  
48  
49  
50  
51  
52  
53  
54  
55  
56  
57  
58  
59  
60

opinions or policies of the Data Stewards. No official endorsement by Population Data BC and  
Pharmanet is intended or should be inferred.

**Data Sharing Statement:** Data sharing not available

For peer review only

## References

1. Leary SM, Porter B, Thompson AJ. Multiple sclerosis: diagnosis and the management of acute relapses. *Postgrad Med J* 2005;81:302-308.
2. Filippini G, Del Giovane C, Vacchi L, et al. Immunomodulators and immunosuppressants for multiple sclerosis: a network meta-analysis. *Cochrane Database Syst Rev* 2013:CD008933.
3. Shirani A, Zhao Y, Karim ME, et al. Association between use of interferon beta and progression of disability in patients with relapsing-remitting multiple sclerosis. *JAMA* 2012;308:247-256.
4. Atlas of MS 2013. Mapping Multiple Sclerosis Around the World. Available at: <https://www.msif.org/wp-content/uploads/2014/09/Atlas-of-MS.pdf> Accessed June 16, 2017.
5. Jimmy B, Jose J. Patient medication adherence: measures in daily practice. *Oman Med J* 2011;26:155-159.
6. Kozma CM, Phillips AL, Meletiche DM. Use of an early disease-modifying drug adherence measure to predict future adherence in patients with multiple sclerosis. *J Manag Care Spec Pharm* 2014;20:800-807.
7. Franklin JM, Krumme AA, Shrank WH, Matlin OS, Brennan TA, Choudhry NK. Predicting adherence trajectory using initial patterns of medication filling. *Am J Manag Care* 2015;21:e537-544.
8. Franklin JM, Shrank WH, Lii J, et al. Observing versus Predicting: Initial Patterns of Filling Predict Long-Term Adherence More Accurately Than High-Dimensional Modeling Techniques. *Health Serv Res* 2016;51:220-239.

- 1  
2  
3 9. Tan H, Cai Q, Agarwal S, Stephenson JJ, Kamat S. Impact of adherence to disease-  
4  
5  
6  
7  
8  
9  
10  
11  
12  
13  
14  
15  
16  
17  
18  
19  
20  
21  
22  
23  
24  
25  
26  
27  
28  
29  
30  
31  
32  
33  
34  
35  
36  
37  
38  
39  
40  
41  
42  
43  
44  
45  
46  
47  
48  
49  
50  
51  
52  
53  
54  
55  
56  
57  
58  
59  
60
10. Kim S, Shin DW, Yun JM, et al. Medication Adherence and the Risk of Cardiovascular Mortality and Hospitalization Among Patients With Newly Prescribed Antihypertensive Medications. *Hypertension* 2016;67:506-512.
11. Krivoy A, Balicer RD, Feldman B, et al. Adherence to antidepressant therapy and mortality rates in ischaemic heart disease: cohort study. *The British journal of psychiatry : the journal of mental science* 2015;206:297-301.
12. Menzin J, Caon C, Nichols C, White LA, Friedman M, Pill MW. Narrative review of the literature on adherence to disease-modifying therapies among patients with multiple sclerosis. *J Manag Care Pharm* 2013;19:S24-40.
13. Devonshire V, Lapierre Y, Macdonell R, et al. The Global Adherence Project (GAP): a multicenter observational study on adherence to disease-modifying therapies in patients with relapsing-remitting multiple sclerosis. *Eur J Neurol* 2011;18:69-77.
14. Kurtzke JF. Rating neurologic impairment in multiple sclerosis: an expanded disability status scale (EDSS). *Neurology* 1983;33:1444-1452.
15. BC Ministry of Health [creator] (2012). PharmaNet. V2. BC Ministry of Health [publisher]. Data Extract. Data Stewardship Committee (2012). <http://www.popdata.bc.ca/data>. Accessed June 17th, 2017 [online].
16. Canadian Institute for Health Information [creator] (2012). Discharge Abstract Database (Hospital Separations). Population Data BC [publisher]. Data Extract. MOH (2012). <http://www.popdata.bc.ca/data>. Accessed June 15th, 2017 [online].

- 1  
2  
3 17. British Columbia Ministry of Health [creator] (2012). Medical Services Plan (MSP)  
4 Payment Information File. V2. Population Data BC [publisher]. Data Extract. MOH (2012).  
5  
6 <http://www.popdata.bc.ca/data>. Accessed June 15th, 2017 [online].  
7  
8
- 9  
10 18. British Columbia Ministry of Health [creator] (2012). Consolidation File (MSP  
11 Registration & Premium Billing). V2. Population Data BC [publisher]. Data Extract. MOH  
12 (2012). <http://www.popdata.bc.ca/data>. Accessed June 17th, 2017 [online].  
13  
14
- 15 19. Wilkins R, Berthelot JM, Ng E. Trends in mortality by neighbourhood income in urban  
16 Canada from 1971 to 1996. *Health Rep* 2002;13 (Suppl):1-27.  
17  
18
- 19 20. Poser CM, Paty DW, Scheinberg L, et al. New diagnostic criteria for multiple sclerosis:  
20 guidelines for research protocols. *Ann Neurol* 1983;13:227-231.  
21  
22
- 23 21. McDonald WI, Compston A, Edan G, et al. Recommended diagnostic criteria for  
24 multiple sclerosis: guidelines from the International Panel on the diagnosis of multiple sclerosis.  
25 *Ann Neurol* 2001;50:121-127.  
26  
27
- 28 22. Rio J, Castillo J, Rovira A, et al. Measures in the first year of therapy predict the response  
29 to interferon beta in MS. *Multiple sclerosis* 2009;15:848-853.  
30  
31
- 32 23. Ho PM, Bryson CL, Rumsfeld JS. Medication adherence: its importance in  
33 cardiovascular outcomes. *Circulation* 2009;119:3028-3035.  
34  
35
- 36 24. Winkelmayr WC, Levin R, Setoguchi S. Associations of kidney function with  
37 cardiovascular medication use after myocardial infarction. *Clin J Am Soc Nephrol* 2008;3:1415-  
38 1422.  
39  
40
- 41 25. Osterberg L, Blaschke T. Adherence to medication. *The New England journal of*  
42 *medicine* 2005;353:487-497.  
43  
44  
45  
46  
47  
48  
49  
50  
51  
52  
53  
54  
55  
56  
57  
58  
59  
60

- 1  
2  
3 26. Karve S, Cleves MA, Helm M, Hudson TJ, West DS, Martin BC. Good and poor  
4 adherence: optimal cut-point for adherence measures using administrative claims data. *Curr Med*  
5  
6 *Res Opin* 2009;25:2303-2310.  
7
- 8  
9  
10 27. Giovannoni G, Cook S, Rammohan K, et al. Sustained disease-activity-free status in  
11 patients with relapsing-remitting multiple sclerosis treated with cladribine tablets in the  
12  
13 CLARITY study: a post-hoc and subgroup analysis. *Lancet Neurol* 2011;10:329-337.  
14
- 15  
16  
17 28. Havrdova E, Galetta S, Hutchinson M, et al. Effect of natalizumab on clinical and  
18 radiological disease activity in multiple sclerosis: a retrospective analysis of the Natalizumab  
19  
20 Safety and Efficacy in Relapsing-Remitting Multiple Sclerosis (AFFIRM) study. *Lancet Neurol*  
21  
22 2009;8:254-260.  
23
- 24  
25  
26 29. Rotstein DL, Healy BC, Malik MT, Chitnis T, Weiner HL. Evaluation of no evidence of  
27 disease activity in a 7-year longitudinal multiple sclerosis cohort. *JAMA Neurol* 2015;72:152-  
28  
29 158.  
30
- 31  
32  
33 30. Hanley JA, Negassa A, Edwardes MD, Forrester JE. Statistical analysis of correlated data  
34 using generalized estimating equations: an orientation. *Am J Epidemiol* 2003;157:364-375.  
35
- 36  
37  
38 31. Hosmer D, Lemeshow S, Sturdivant R. *Applied Logistic Regression* (3rd edn). Wiley:  
39 New York, 2013.  
40
- 41  
42  
43 32. WHO Collaborating Centre for Drug Statistics Methodology. Guidelines for ATC  
44 classification and DDD assignment 2013. Oslo, 2012. [online].  
45
- 46  
47  
48 33. Deyo RA, Cherkin DC, Ciol MA. Adapting a clinical comorbidity index for use with  
49 ICD-9-CM administrative databases. *J Clin Epidemiol* 1992;45:613-619.  
50
- 51  
52  
53 34. IBM Corp. Released 2013. IBM SPSS Statistics for Windows, Version 22.0. Armonk,  
54 NY: IBM Corp. Accessed January 29th, 2016 [online].  
55  
56  
57  
58  
59  
60

- 1  
2  
3  
4  
5  
6  
7  
8  
9  
10  
11  
12  
13  
14  
15  
16  
17  
18  
19  
20  
21  
22  
23  
24  
25  
26  
27  
28  
29  
30  
31  
32  
33  
34  
35  
36  
37  
38  
39  
40  
41  
42  
43  
44  
45  
46  
47  
48  
49  
50  
51  
52  
53  
54  
55  
56  
57  
58  
59  
60
35. R Core Team (2016). R: A language and environment for statistical computing. R Foundation for Statistical Computing, Vienna, Austria. URL <http://www.R-project.org/>. Accessed on January 29, 2016.
36. Evans C, Marrie RA, Zhu F, et al. Adherence and persistence to drug therapies for multiple sclerosis: A population-based study. *Mult Scler Relat Disord* 2016;8:78-85.
37. Steinberg SC, Faris RJ, Chang CF, Chan A, Tankersley MA. Impact of adherence to interferons in the treatment of multiple sclerosis: a non-experimental, retrospective, cohort study. *Clin Drug Investig* 2010;30:89-100.
38. Tramacere I, Del Giovane C, Salanti G, D'Amico R, Filippini G. Immunomodulators and immunosuppressants for relapsing-remitting multiple sclerosis: a network meta-analysis. *Cochrane Database Syst Rev* 2015:CD011381.
39. McKay KA, Tremlett H, Patten SB, et al. Determinants of non-adherence to disease-modifying therapies in multiple sclerosis: A cross-Canada prospective study. *Multiple sclerosis* 2017;23:588-596.
40. McKay KA, Jahanfar S, Duggan T, Tkachuk S, Tremlett H. Factors associated with onset, relapses or progression in multiple sclerosis: A systematic review. *Neurotoxicology* 2015.



**Table 1.** Characteristics of subjects included in the primary analysis (n=801)

| Characteristics                                   | Descriptive Summaries |
|---------------------------------------------------|-----------------------|
| <i>At the index date (baseline)</i>               |                       |
| Sex, n (%):                                       |                       |
| Males                                             | 192 (24.0)            |
| Females                                           | 609 (76.0)            |
| Age in years, mean (SD)                           | 41.5 (9.5)            |
| <sup>a</sup> Disease duration in years, mean (SD) | 9.9 (8.3)             |
| Initial (index) IMD, n (%):                       |                       |
| Beta-interferon                                   | 713 (89.0)            |
| Glatiramer acetate                                | 88 (11.0)             |
| <i>During the baseline year</i>                   |                       |
| EDSS, median (IQR)                                | 3.0 (2.0 - 4.0)       |
| EDSS, n (%):                                      |                       |
| ≤3                                                | 472 (58.9)            |
| >3 and ≤5.5                                       | 201 (25.1)            |
| ≥6                                                | 128 (16.0)            |
| Concurrent prescription drug classes, n (%):      |                       |
| 0-2                                               | 252 (31.5)            |
| 3-4                                               | 194 (24.2)            |
| 5-≤6                                              | 185 (23.1)            |
| ≥7                                                | 170 (21.2)            |

|                                            |            |
|--------------------------------------------|------------|
| <sup>b</sup> Socioeconomic status, n (%):  |            |
| 1 (lowest)                                 | 130 (16.2) |
| 2                                          | 136 (17.0) |
| 3                                          | 179 (22.3) |
| 4                                          | 164 (20.5) |
| 5 (highest)                                | 168 (21.0) |
| Charlson's comorbidity index score, n (%): |            |
| 0                                          | 729 (91.0) |
| ≥1                                         | 72 (9.0)   |

Abbreviations: EDSS, Expanded Disability Status Scale; IQR, interquartile range.

<sup>a</sup>Disease duration measured from MS symptom onset (recorded in the BCMS database) to the index date (missing for 5 subjects).

<sup>b</sup>Based on neighbourhood income at index (missing for 19 subjects).

**Table 2.** Association between IMD adherence and disability accumulation: results from the GEE models (n=801)

| Factors                                         | Odds Ratios <sup>a</sup> (95% Confidence Intervals) |                        |
|-------------------------------------------------|-----------------------------------------------------|------------------------|
|                                                 | Univariate Analysis                                 | Multivariable Analysis |
| <b>Level of adherence (PDC)</b>                 |                                                     |                        |
| Suboptimal (<80%)                               | 1                                                   | 1                      |
| Optimal (≥80%)                                  | 0.94 (0.78 – 1.13)                                  | 0.94 (0.78 – 1.15)     |
| <b>Sex</b>                                      |                                                     |                        |
| Female                                          | 1                                                   | 1                      |
| Male                                            | 1.28 (1.07 – 1.52)                                  | 1.28 (1.07 – 1.53)     |
| Baseline age, years                             | 1.07 (0.99 – 1.01)                                  | 1.00 (0.99 - 1.01)     |
| Baseline EDSS                                   | 1.03 (0.98 – 1.08)                                  | 1.03 (0.98 – 1.08)     |
| Time (years) between reference and outcome EDSS | 1.41 (1.30 – 1.55)                                  | 1.42 (1.30 - 1.56)     |

Abbreviations: EDSS, Expanded Disability Status Scale; PDC, proportion of days covered

<sup>a</sup>Odds ratio >1 indicates an increased likelihood of disability accumulation.

## SUPPLEMENTARY MATERIAL

### Additional Methodological Details – Secondary Analysis

For the secondary outcome of time to a confirmed and sustained EDSS score of 6.0, subjects were required to have at least one year of residency in BC following initiation of treatment ('Year 1'). There were additional residency and EDSS related requirements. Subjects were required to have at least two EDSS scores; one recorded during Year 1 (the baseline EDSS) and one after Year 1. For this time-to-event analysis, subjects were followed from the start of Year 2 until either the outcome was reached or the study end (Figure S1b). Adherence was estimated using the proportion of days covered (PDC) during Year 1. If the outcome was not reached, subjects were censored at their last recorded EDSS score, or at the preceding EDSS measurement if the last score was  $\geq 6.0$  and could not be confirmed as sustained.

Potential confounders for the multivariable Cox proportional hazards models included sex, age, EDSS, SES quintile, number of distinct prescription drug classes (fourth level of ATC classification), and Deyo's adaption of the Charlson comorbidity index, all measured during Year 1. Covariates were categorized, and selected for inclusion in the adjusted model, using the same approach as for the primary analyses.

#### *Results from the secondary analysis*

The secondary analysis, examining the association between IMD adherence and time to sustained EDSS 6.0, included 673 MS subjects. Similar to results from the primary analysis,

1  
2  
3 SES, prescription drug exposure and the comorbidity index were not significantly associated  
4  
5 with time to sustained EDSS 6. After adjustment for sex, age, and baseline EDSS, optimal  
6  
7 adherence was not found to be associated with the hazard of reaching sustained EDSS 6.0  
8  
9 (adjusted hazard ratio (adjHR) 0.91; 95% CI 0.57 – 1.44) (Table S1). A shorter time to the  
10  
11 disability outcome was associated with increased age [adjHR 1.02; 95% CI 1.00 – 1.05] and with  
12  
13 higher baseline EDSS [adjHR 1.49; 95% CI 1.33 – 1.68].  
14  
15  
16  
17  
18  
19

### 20 *Results from the sensitivity analyses*

21  
22 A total of 634 subjects were included in the sensitivity analysis, in which the effects of IMD  
23  
24 adherence on disability accumulation were examined only over the period that the subject was  
25  
26 still ‘on drug’. Optimal adherence was not associated with disability accumulation (adjusted odds  
27  
28 ratio (adjOR) 1.06; 95% CI 0.81 – 1.39) (Table S2).  
29  
30  
31  
32  
33  
34

35 A total of 801 subjects were included in the sensitivity analysis where the lowest, rather than  
36  
37 highest, score was used as the outcome EDSS when multiple EDSS scores were recorded in a  
38  
39 single one-year interval. Consistent with the primary analysis, optimal adherence was not  
40  
41 associated with disability accumulation (adjOR 1.03; 95% CI 0.84 – 1.26), (Table S2).  
42  
43  
44  
45  
46  
47  
48

49 When we examined the association between first year adherence and disability accumulation in  
50  
51 only those subjects with both reference and outcome EDSS scores available for every year  
52  
53 between the index date and study end date, a total of 703 were included in this analysis.  
54  
55  
56  
57  
58  
59  
60

1  
2  
3 Consistent with previous findings, optimal adherence was not associated with disability  
4  
5 accumulation (adjOR 1.12; 95% CI 0.87 – 1.44).  
6  
7  
8  
9  
10  
11  
12  
13  
14  
15  
16  
17  
18  
19  
20  
21  
22  
23  
24  
25  
26  
27  
28  
29  
30  
31  
32  
33  
34  
35  
36  
37  
38  
39  
40  
41  
42  
43  
44  
45  
46  
47  
48  
49  
50  
51  
52  
53  
54  
55  
56  
57  
58  
59  
60

For peer review only

**Table S1.** Association between IMD adherence and disability accumulation: findings based on Cox Proportional Regression analysis of time to sustained EDSS 6 (n=673)

| Factors                         | Hazard Ratios <sup>a</sup> (95% Confidence Intervals) |                                     |
|---------------------------------|-------------------------------------------------------|-------------------------------------|
|                                 | Univariate Analysis                                   | Multivariable Analysis <sup>b</sup> |
| <b>Level of adherence (PDC)</b> |                                                       |                                     |
| ‘Suboptimal’ (<80%)             | 1                                                     | 1                                   |
| ‘Optimal’ (≥80%)                | 0.84 (0.53 – 1.33)                                    | 0.91 (0.57 – 1.44)                  |
| <b>Sex</b>                      |                                                       |                                     |
| Female                          | 1                                                     | 1                                   |
| Male                            | 1.49 (0.97 – 2.31)                                    | 1.20 (0.77 – 1.88)                  |
| <b>Baseline age, years</b>      | 1.03 (1.01 – 1.06)                                    | 1.02 (1.00 – 1.05)                  |
| <b>Baseline EDSS</b>            | 1.53 (1.37 – 1.71)                                    | 1.49 (1.33 – 1.68)                  |

Abbreviations: EDSS, Expanded Disability Status Scale; PDC, proportion of days covered.

<sup>a</sup>Hazard ratio > 1 indicated an increased hazard of disability accumulation.

<sup>b</sup>Model adjusted for age, sex, and baseline EDSS

**Table S2.** Association between IMD adherence and disability accumulation: findings from the three sensitivity analyses

| Factors                                                                                                                                                                                                  | Odds Ratios <sup>a</sup> (95% Confidence Intervals) |                        |
|----------------------------------------------------------------------------------------------------------------------------------------------------------------------------------------------------------|-----------------------------------------------------|------------------------|
|                                                                                                                                                                                                          | Univariate Analysis                                 | Multivariable Analysis |
| <i><sup>b</sup>Analysis 1: Follow-up continued only during exposure to first-line injectable IMDs (n=634)</i>                                                                                            |                                                     |                        |
| Level of adherence (PDC)                                                                                                                                                                                 |                                                     |                        |
| ‘Suboptimal’ (<80%)                                                                                                                                                                                      | 1                                                   | 1                      |
| ‘Optimal’ (≥80%)                                                                                                                                                                                         | 1.04 (0.80 – 1.34)                                  | 1.06 (0.81 – 1.39)     |
| <i>Analysis 2: When multiple EDSS scores were available in a given year, the lowest (rather than highest) was selected (n=801)</i>                                                                       |                                                     |                        |
| Level of adherence (PDC)                                                                                                                                                                                 |                                                     |                        |
| ‘Suboptimal’ (<80%)                                                                                                                                                                                      | 1                                                   | 1                      |
| ‘Optimal’ (≥80%)                                                                                                                                                                                         | 1.02 (0.84 – 1.23)                                  | 1.03 (0.84 – 1.26)     |
| <i><sup>c</sup>Analysis 3: EDSS scores were not carried forward (only patients with both reference and outcome EDSS scores for every year between the index date and study end were included, n=703)</i> |                                                     |                        |
| Level of adherence (PDC)                                                                                                                                                                                 |                                                     |                        |
| Suboptimal (<80%)                                                                                                                                                                                        | 1                                                   | 1                      |
| Optimal (≥80%)                                                                                                                                                                                           | 1.16 (0.91 - 1.48)                                  | 1.12 (0.87 – 1.44)     |

Abbreviations: EDSS, Expanded Disability Status Scale; PDC, proportion of days covered; IMD, immunomodulatory drug.



1  
2  
3 Each model was adjusted for sex, baseline age, baseline EDSS, and time between the reference  
4 and outcome EDSS.  
5  
6

7  
8 <sup>a</sup>OR>1 indicated an increased likelihood of disability accumulation; hazard ratio >1 indicated an  
9 increased hazard of disability accumulation.  
10  
11

12  
13 <sup>b</sup>Analysis 1: Subjects were followed until the last available EDSS before: first-line IMD  
14 discontinuation, initiation of a non-first line IMD, MS drug clinical trial registration, or  
15 December 31, 2008. There were 167 fewer subjects included in this sensitivity analysis  
16 compared to the primary analysis because these individuals discontinued their first-line  
17 injectable IMD before the start of Year 2 (i.e. no follow-up EDSS assessments were available  
18 prior to drug discontinuation).  
19  
20  
21  
22  
23  
24  
25  
26  
27

28  
29 <sup>c</sup>Analysis 3: There were 98 fewer subjects included compared to the primary analysis because  
30 these individuals did not have at least one EDSS score available in each one year interval  
31 between the index date and the study end date.  
32  
33  
34  
35  
36  
37  
38  
39  
40  
41  
42  
43  
44  
45  
46  
47  
48  
49  
50  
51  
52  
53  
54  
55  
56  
57  
58  
59  
60

**Figure S1.** Measurement of the study exposure (adherence) and outcomes (disability accumulation and the sustained disability milestone, EDSS 6.0)

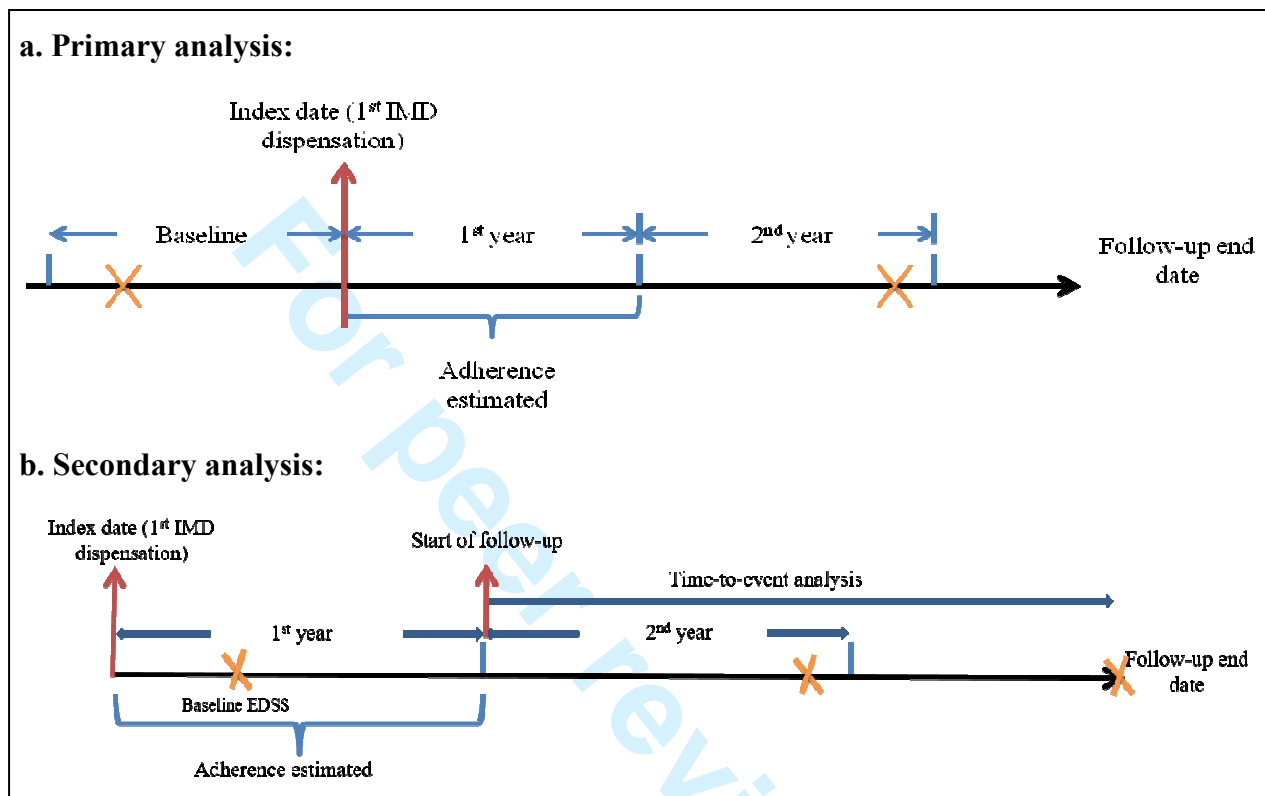

Notes:

X indicates a recorded EDSS score.

Subjects were followed from their index date (date of the first IMD dispensation) until the last available EDSS score recorded prior to the study end.

- a. For the primary analysis, adherence was measured during Year 1. EDSS scores were examined during each one-year interval from Year 2 onwards to determine if disability accumulation had occurred (yes/no) relative to the previous year (the reference interval). The effects of IMD adherence on subsequent disability accumulation were examined using generalized estimating equations.

1  
2  
3 If no EDSS score was available during the reference interval, the EDSS score from the most  
4 recent interval (including the baseline year) with a recorded EDSS score was used as the  
5 reference. In Figure 1a, for example, as an EDSS score was not available during Year 1, the  
6 baseline EDSS served as the reference for the EDSS score during Year 2.  
7  
8  
9  
10  
11

- 12  
13 b. For the secondary analysis, adherence was measured during Year 1. Time from the beginning  
14 of Year 2 (start of follow-up) to a confirmed and sustained EDSS score of 6.0 was modeled  
15 using multivariable Cox proportional hazards regression models, which were adjusted for sex  
16 and age at the start of Year 2, and Year 1 (baseline) EDSS. In the situation where a patient  
17 reached EDSS 6.0 at their last assessment, but this was not confirmed by another score of  
18 EDSS  $\geq$  6.0 after at least 180 days, the patient was censored at the preceding EDSS  
19 assessment.  
20  
21  
22  
23  
24  
25  
26  
27  
28  
29  
30  
31  
32  
33  
34  
35  
36  
37  
38  
39  
40  
41  
42  
43  
44  
45  
46  
47  
48  
49  
50  
51  
52  
53  
54  
55  
56  
57  
58  
59  
60

## STROBE Statement—checklist of items that should be included in reports of observational studies

|                              | Item No                      | Recommendation                                                                                                                                                                                                                                                                                                                                                                                                                                                                                                                                                                                                                                                                                       |
|------------------------------|------------------------------|------------------------------------------------------------------------------------------------------------------------------------------------------------------------------------------------------------------------------------------------------------------------------------------------------------------------------------------------------------------------------------------------------------------------------------------------------------------------------------------------------------------------------------------------------------------------------------------------------------------------------------------------------------------------------------------------------|
| <b>Title and abstract</b>    | Pg<br>1,3                    | (a) Indicate the study's design with a commonly used term in the title or the abstract<br><br>(b) Provide in the abstract an informative and balanced summary of what was done and what was found                                                                                                                                                                                                                                                                                                                                                                                                                                                                                                    |
| <b>Introduction</b>          |                              |                                                                                                                                                                                                                                                                                                                                                                                                                                                                                                                                                                                                                                                                                                      |
| Background/rationale         | Pg<br>5                      | Explain the scientific background and rationale for the investigation being reported                                                                                                                                                                                                                                                                                                                                                                                                                                                                                                                                                                                                                 |
| Objectives                   | Pg<br>5                      | State specific objectives, including any prespecified hypotheses                                                                                                                                                                                                                                                                                                                                                                                                                                                                                                                                                                                                                                     |
| <b>Methods</b>               |                              |                                                                                                                                                                                                                                                                                                                                                                                                                                                                                                                                                                                                                                                                                                      |
| Study design                 | Pg<br>6                      | Present key elements of study design early in the paper                                                                                                                                                                                                                                                                                                                                                                                                                                                                                                                                                                                                                                              |
| Setting                      | Pg<br>6-7                    | Describe the setting, locations, and relevant dates, including periods of recruitment, exposure, follow-up, and data collection                                                                                                                                                                                                                                                                                                                                                                                                                                                                                                                                                                      |
| Participants                 | Pg<br>7-8                    | (a) <i>Cohort study</i> —Give the eligibility criteria, and the sources and methods of selection of participants. Describe methods of follow-up<br><i>Case-control study</i> —Give the eligibility criteria, and the sources and methods of case ascertainment and control selection. Give the rationale for the choice of cases and controls<br><i>Cross-sectional study</i> —Give the eligibility criteria, and the sources and methods of selection of participants<br><br>(b) <i>Cohort study</i> —For matched studies, give matching criteria and number of exposed and unexposed<br><i>Case-control study</i> —For matched studies, give matching criteria and the number of controls per case |
| Variables                    | Pg<br>7-10                   | Clearly define all outcomes, exposures, predictors, potential confounders, and effect modifiers. Give diagnostic criteria, if applicable                                                                                                                                                                                                                                                                                                                                                                                                                                                                                                                                                             |
| Data sources/<br>measurement | Pg<br>7-10                   | For each variable of interest, give sources of data and details of methods of assessment (measurement). Describe comparability of assessment methods if there is more than one group                                                                                                                                                                                                                                                                                                                                                                                                                                                                                                                 |
| Bias                         | Pg<br>13                     | Describe any efforts to address potential sources of bias                                                                                                                                                                                                                                                                                                                                                                                                                                                                                                                                                                                                                                            |
| Study size                   | Pg<br>7                      | Explain how the study size was arrived at<br>We were limited to the number of subjects registered in the MS clinics who met the eligibility criteria                                                                                                                                                                                                                                                                                                                                                                                                                                                                                                                                                 |
| Quantitative variables       | Pg<br>9<br>Supp<br>Materials | Explain how quantitative variables were handled in the analyses. If applicable, describe which groupings were chosen and why<br>Also see Supplementary Materials                                                                                                                                                                                                                                                                                                                                                                                                                                                                                                                                     |
| Statistical methods          | Pg<br>9<br>Supp<br>Materials | (a) Describe all statistical methods, including those used to control for confounding<br><br>(b) Describe any methods used to examine subgroups and interactions<br><br>(c) Explain how missing data were addressed<br><br>(d) <i>Cohort study</i> —If applicable, explain how loss to follow-up was addressed                                                                                                                                                                                                                                                                                                                                                                                       |

1  
2  
3  
4  
5  
6  
7  
8  
9  
10  
11  
12  
13  
14  
15  
16  
17  
18  
19  
20  
21  
22  
23  
24  
25  
26  
27  
28  
29  
30  
31  
32  
33  
34  
35  
36  
37  
38  
39  
40  
41  
42  
43  
44  
45  
46  
47  
48  
49  
50  
51  
52  
53  
54  
55  
56  
57  
58  
59  
60

*Case-control study*—If applicable, explain how matching of cases and controls was addressed

*Cross-sectional study*—If applicable, describe analytical methods taking account of sampling strategy

Also see Supplementary Materials

---

(g) Describe any sensitivity analyses

Continued on next page

For peer review only

**Results**

|                  |                                          |                                                                                                                                                                                                                                                                                                                                                                                                                       |
|------------------|------------------------------------------|-----------------------------------------------------------------------------------------------------------------------------------------------------------------------------------------------------------------------------------------------------------------------------------------------------------------------------------------------------------------------------------------------------------------------|
| Participants     | Pg<br>10-11                              | (a) Report numbers of individuals at each stage of study—eg numbers potentially eligible, examined for eligibility, confirmed eligible, included in the study, completing follow-up, and analysed<br><br>(b) Give reasons for non-participation at each stage<br><br>(c) Consider use of a flow diagram                                                                                                               |
| Descriptive data | Pg<br>10-11<br>Table 1                   | (a) Give characteristics of study participants (eg demographic, clinical, social) and information on exposures and potential confounders<br><br>(b) Indicate number of participants with missing data for each variable of interest<br><br>(c) <i>Cohort study</i> —Summarise follow-up time (eg, average and total amount)                                                                                           |
| Outcome data     | Pg<br>11<br>Supp<br>Materials            | <i>Cohort study</i> —Report numbers of outcome events or summary measures over time<br><br><i>Case-control study</i> —Report numbers in each exposure category, or summary measures of exposure<br><br><i>Cross-sectional study</i> —Report numbers of outcome events or summary measures                                                                                                                             |
| Main results     | Pg<br>11<br>Table 2<br>Supp<br>Materials | (a) Give unadjusted estimates and, if applicable, confounder-adjusted estimates and their precision (eg, 95% confidence interval). Make clear which confounders were adjusted for and why they were included<br><br>(b) Report category boundaries when continuous variables were categorized<br><br>(c) If relevant, consider translating estimates of relative risk into absolute risk for a meaningful time period |
| Other analyses   | Supp<br>Materials                        | Report other analyses done—eg analyses of subgroups and interactions, and sensitivity analyses                                                                                                                                                                                                                                                                                                                        |

**Discussion**

|                  |             |                                                                                                                                                                            |
|------------------|-------------|----------------------------------------------------------------------------------------------------------------------------------------------------------------------------|
| Key results      | Pg<br>11-12 | Summarise key results with reference to study objectives                                                                                                                   |
| Limitations      | Pg<br>14    | Discuss limitations of the study, taking into account sources of potential bias or imprecision. Discuss both direction and magnitude of any potential bias                 |
| Interpretation   | Pg<br>14    | Give a cautious overall interpretation of results considering objectives, limitations, multiplicity of analyses, results from similar studies, and other relevant evidence |
| Generalisability | Pg<br>13    | Discuss the generalisability (external validity) of the study results                                                                                                      |

**Other information**

|         |          |                                                                                                                                                               |
|---------|----------|---------------------------------------------------------------------------------------------------------------------------------------------------------------|
| Funding | Pg<br>16 | Give the source of funding and the role of the funders for the present study and, if applicable, for the original study on which the present article is based |
|---------|----------|---------------------------------------------------------------------------------------------------------------------------------------------------------------|

\*Give information separately for cases and controls in case-control studies and, if applicable, for exposed and unexposed groups in cohort and cross-sectional studies.

**Note:** An Explanation and Elaboration article discusses each checklist item and gives methodological background and published examples of transparent reporting. The STROBE checklist is best used in conjunction with this article (freely available on the Web sites of PLoS Medicine at <http://www.plosmedicine.org/>, Annals of Internal Medicine at <http://www.annals.org/>, and Epidemiology at <http://www.epidem.com/>). Information on the STROBE Initiative is available at [www.strobe-statement.org](http://www.strobe-statement.org).

# BMJ Open

## Effect of adherence to the first-generation injectable immunomodulatory drugs on disability accumulation in multiple sclerosis: a longitudinal cohort study

|                                    |                                                                                                                                                                                                                                                                                                                                                                                                                                                                                                                                                                                                                      |
|------------------------------------|----------------------------------------------------------------------------------------------------------------------------------------------------------------------------------------------------------------------------------------------------------------------------------------------------------------------------------------------------------------------------------------------------------------------------------------------------------------------------------------------------------------------------------------------------------------------------------------------------------------------|
| Journal:                           | <i>BMJ Open</i>                                                                                                                                                                                                                                                                                                                                                                                                                                                                                                                                                                                                      |
| Manuscript ID                      | bmjopen-2017-018612.R1                                                                                                                                                                                                                                                                                                                                                                                                                                                                                                                                                                                               |
| Article Type:                      | Research                                                                                                                                                                                                                                                                                                                                                                                                                                                                                                                                                                                                             |
| Date Submitted by the Author:      | 22-Aug-2017                                                                                                                                                                                                                                                                                                                                                                                                                                                                                                                                                                                                          |
| Complete List of Authors:          | Zhang, Tingting; Brown University School of Public Health<br>Kingwell, Elaine; University of British Columbia Faculty of Medicine<br>Zhu, Feng; University of British Columbia Faculty of Medicine<br>Petkau, John ; University of British Columbia, Department of Statistics<br>Kastrukoff, Lorne; University of British Columbia, Medicine<br>Marrie, Ruth; University of Manitoba, Departments of Internal Medicine and<br>Community Health Sciences<br>Tremlett, Helen; University Of British Columbia, Medicine (Neurology)<br>Evans, Charity; University of Saskatchewan, College of Pharmacy and<br>Nutrition |
| <b>Primary Subject<br>Heading</b>: | Neurology                                                                                                                                                                                                                                                                                                                                                                                                                                                                                                                                                                                                            |
| Secondary Subject Heading:         | Pharmacology and therapeutics                                                                                                                                                                                                                                                                                                                                                                                                                                                                                                                                                                                        |
| Keywords:                          | Multiple sclerosis < NEUROLOGY, Adherence, Disease progression,<br>Immunomodulatory drugs                                                                                                                                                                                                                                                                                                                                                                                                                                                                                                                            |
|                                    |                                                                                                                                                                                                                                                                                                                                                                                                                                                                                                                                                                                                                      |

SCHOLARONE™  
Manuscripts

1  
2  
3 **Effect of adherence to the first-generation injectable immunomodulatory drugs on**  
4 **disability accumulation in multiple sclerosis: a longitudinal cohort study**  
5  
6  
7  
8  
9

10 Tingting Zhang<sup>1</sup>, MD, PhD; Elaine Kingwell<sup>2</sup>, PhD; Feng Zhu<sup>2</sup>, MSc; John Petkau<sup>3</sup>, PhD; Lorne  
11 F. Kastrukoff<sup>2</sup>, MD; Ruth Ann Marrie<sup>4</sup>, MD, PhD; Helen Tremlett<sup>2</sup>, PhD; Charity Evans<sup>5</sup>, PhD  
12  
13  
14  
15

16  
17  
18 **Affiliations:**

19  
20 <sup>1</sup>Department of Health Services, Policy & Practice, Brown University School of Public Health,  
21 Providence, United States  
22  
23

24  
25 <sup>2</sup>Department of Medicine (Neurology) and the Centre for Brain Health, University of British  
26 Columbia, Canada  
27  
28

29  
30 <sup>3</sup>Department of Statistics, University of British Columbia, Canada  
31

32  
33 <sup>4</sup>Departments of Internal Medicine and Community Health Sciences, Max Rady College of  
34 Medicine, Rady Faculty of Health Sciences, University of Manitoba, Winnipeg, Canada  
35

36  
37 <sup>5</sup>College of Pharmacy and Nutrition, University of Saskatchewan, Saskatoon, Canada  
38  
39  
40

41 **Corresponding author:**

42  
43 Charity Evans  
44

45  
46 College of Pharmacy and Nutrition  
47

48  
49 University of Saskatchewan  
50

51  
52 104 Clinic Place  
53

54  
55 Saskatoon, Saskatchewan S7N 2Z4  
56

57  
58 [charity.evans@usask.ca](mailto:charity.evans@usask.ca)  
59  
60



**Word Counts:**

Abstract: 232

Main text: 2,702

Title Characters: 155

References: 41

Tables: 2

Figures: 1

Supplementary document: supplementary methods, Table S1, Table S2 and Figure S1

**ABSTRACT**

**Objective:** To examine the association between optimal adherence to the first-generation injectable immunomodulatory drugs (IMDs) for multiple sclerosis (MS) and subsequent disability accumulation.

**Methods:** We accessed prospectively collected linked clinical and administrative health data from British Columbia, Canada. MS subjects treated with a first-generation injectable IMD at a MS Clinic (1996-2004) were followed until their last clinic visit before 2009. Adherence was estimated using the proportion of days covered (PDC). The primary outcome was disability accumulation, defined as an increase in the Expanded Disability Status Scale (EDSS) score as recorded during each year of follow-up. Generalized estimating equation models, adjusted for baseline sex, age, EDSS and time between scores, were used to measure associations between optimal adherence ( $\geq 80\%$  PDC) during the first year of treatment and subsequent disability accumulation. The relationship between early IMD adherence and the secondary outcome, time to sustained EDSS 6, was examined using Cox proportional hazards regression.

**Results:** Among 801 subjects, 598 (74.7%) had optimal adherence over the first year of IMD treatment and 487 (39.0%) demonstrated one or more instances of disability accumulation. Early optimal adherence was not associated with disability accumulation (adjusted odds ratio 0.94;95%CI:0.78-1.15), nor with time to sustained EDSS 6 (adjusted hazard ratio 0.91;95%CI:0.57-1.44).

**Conclusions:** Almost three-quarters of MS subjects had optimal early adherence to their first-line injectable IMD. There was no evidence that this was associated with disability accumulation in the following years.

1  
2  
3 **KEYWORDS:** Multiple sclerosis; adherence, immunomodulatory drugs, disease progression,  
4  
5 longitudinal analysis, observational study  
6  
7  
8  
9

#### 10 **STRENGTHS AND LIMITATIONS OF THIS STUDY**

- 12 - One of the first population-based studies to examine the association between drug  
13 adherence and subsequent disability accumulation in multiple sclerosis  
14
- 15 - Real world setting which increases the generalizability of the study results  
16
- 17 - Observational studies cannot adjust or assess all potential (unknown) confounders  
18  
19  
20  
21  
22  
23  
24  
25  
26  
27  
28  
29  
30  
31  
32  
33  
34  
35  
36  
37  
38  
39  
40  
41  
42  
43  
44  
45  
46  
47  
48  
49  
50  
51  
52  
53  
54  
55  
56  
57  
58  
59  
60

## INTRODUCTION

Multiple sclerosis (MS) is a chronic inflammatory disease of the central nervous system and is considered one of the most common reasons for non-trauma related disability in young adults.<sup>1</sup>

The injectable immunomodulatory therapies (IMDs), beta-interferon and glatiramer acetate, are associated with reduced MS relapse rates in short-term clinical trials,<sup>2</sup> but the evidence regarding the effects of these therapies on longer-term disability progression drawn from observational studies is mixed.<sup>2,3</sup> These drugs are considered first-line therapies in Canada, and are commonly used to treat MS worldwide.<sup>4</sup>

To maximize the potential benefit of any drug, it should be taken as indicated; however, multiple lifestyle, patient-specific and drug-related factors can affect adherence.<sup>5</sup> Adherence levels early in treatment predict future adherence patterns.<sup>6-8</sup> In general, poor medication adherence is associated with poorer health-related outcomes, including higher risk of morbidity and mortality, increased health services utilization, and increased health care costs.<sup>9-11</sup> In MS, poor adherence to the IMDs is associated with decreased quality of life, higher relapse rates and higher medical costs.<sup>9, 12, 13</sup> However, to date, the effects of IMD adherence on MS progression are unknown. We examined the association between adherence during the initial year of therapy to a first-line injectable IMD and subsequent disability accumulation in people with relapsing-onset MS in British Columbia (BC), Canada.

## METHODS

### *Study design and data sources*

This was a retrospective cohort study, involving linkage of prospectively collected clinical and administrative health data in BC. The BC Multiple Sclerosis (BCMS) database was the source of the MS cohort. This database, established in 1980, captures detailed clinical information on patients registered at one of the four original MS clinics in BC. The BCMS cohort had previously been linked to BC administrative data to the end of 2008; linkage was complete in 2010 at which time all personal identifiers were removed. Routinely collected data include date of MS symptom onset, disease course at onset (relapsing or primary progressive), and level of disability at the time of each clinical assessment as measured by the Expanded Disability Status Scale [EDSS].<sup>14</sup>

British Columbia's comprehensive drug database (PharmaNet)<sup>15</sup> captures >99% of prescriptions dispensed at outpatient and community pharmacies, with data available since January 1<sup>st</sup>, 1996. The Medical Service Plan database contains physician billing records including dates and diagnostic codes for each patient encounter using the International Classification of Disease (ICD), ninth version, and the Discharge Abstracts Database contains hospital admission and discharge dates,<sup>16, 17</sup> and diagnosis codes using ICD ninth version (to 2004) or ICD tenth (from 2005) systems. These databases were used to estimate the comorbidity status of patients. The BC Registration and Premium Billing Files,<sup>18</sup> which include registration dates in the compulsory provincial health care plan, were used to confirm residency during the study period. An estimate of socioeconomic status (SES) was obtained from each individual's postal code and census-derived neighbourhood income data using an algorithm developed by Statistics Canada.<sup>19</sup> A

1  
2  
3 study-specific dataset was created by linking the data at the individual-level using each person's  
4  
5 unique personal health number (a life-long number assigned to every resident of BC). All  
6  
7 personal identifiers were removed before data release and analyses.  
8  
9

10  
11  
12 Ethical approval for this study was granted by the University of British Columbia's Clinical  
13  
14 Research Ethics Board.  
15  
16

### 17 18 19 *Study cohort*

20  
21 The study subjects included all persons with MS diagnosed by a MS specialist neurologist<sup>20, 21</sup>  
22  
23 who were registered at a BCMS Clinic before December 31, 2004, and received at least one  
24  
25 prescription dispensation for a first-line injectable IMD between January 1, 1996 and December  
26  
27 31, 2008 as recorded in the provincial prescription database. The only first-line IMDs available  
28  
29 during the study period were interferon-beta-1b, interferon-beta-1a, and glatiramer acetate.  
30  
31  
32

33  
34  
35  
36 Subjects were followed from their index date (date of the first IMD dispensation) until the last  
37  
38 recorded EDSS score before the study end date which was defined as the earlier of: start of a  
39  
40 non-first-line IMD for MS, entry in a MS drug-related clinical trial or December 31, 2008.

41  
42  
43 Subjects were required to have at least one year of residency in BC before the index date (the  
44  
45 'baseline year') and one year of residency between the index date and study end. Subjects were  
46  
47 also required to have at least two recorded EDSS scores; one during the baseline year and one  
48  
49 after the first year of IMD therapy. Because the first IMD for MS was approved for use in  
50  
51 Canada 1995, virtually all of the included subjects were incident (new) users.  
52  
53  
54  
55  
56  
57  
58  
59  
60

### *Study Exposure and Outcome*

In the absence of guidelines for how long an individual should remain on an IMD, or prior studies examining adherence and disability progression, we examined adherence during the first year of therapy. Prior studies have suggested that this first year may be clinically relevant, predicting longer-term response to the IMDs.<sup>22</sup> Adherence was estimated using the proportion of days covered (PDC) measure, calculated as the total number of days of drug dispensed during the one-year period divided by 365 days.<sup>23</sup> All first-line injectable IMDs were considered as one therapeutic group, and switching between these agents was allowed. A PDC of  $\geq 80\%$  indicated ‘optimal’ adherence, and  $< 80\%$  indicated ‘suboptimal’ adherence.<sup>24</sup> This threshold was used because it has been associated with health-related outcomes in previous studies, and to allow for comparison with other adherence-related findings.<sup>25, 26</sup>

The outcome of interest was disability accumulation, defined as an increase in the EDSS score of at least:

- (1) 1.5 points if the reference (prior) EDSS was 0<sup>27-29</sup>
- (2) 1 EDSS point if the reference (prior) EDSS was  $\geq 1$  and  $< 5$ <sup>27, 28</sup>
- (3) 0.5 point if the reference (prior) EDSS was  $\geq 5.0$ <sup>27</sup>

Each subject’s follow-up period was divided into one year intervals. EDSS scores were examined for each one-year interval (starting during the 2<sup>nd</sup> year after the index date) to determine if disability accumulation had occurred (categorized as ‘yes or no’) relative to the previous year. The date the EDSS score was recorded within each yearly interval was the ‘outcome date’ for that interval. If multiple EDSS scores were recorded in a single interval, the

1  
2  
3 highest (and earliest in the case of identical scores) was used. If no EDSS score was recorded in  
4  
5 the reference interval, the score from most recent one year interval with an available EDSS score  
6  
7 was used as the reference (*Figure S1*).  
8  
9

### 10 11 12 *Statistical analyses and model adjustment*

13  
14  
15 The association between IMD adherence and subsequent disability accumulation was examined  
16  
17 using logistic regression models fitted via generalized estimating equations with an exchangeable  
18  
19 working correlation structure.<sup>30</sup> IMD adherence was modeled as a binary variable (optimal vs.  
20  
21 suboptimal). Potential confounders were selected for inclusion in the final models based either  
22  
23 on clinical relevance (baseline sex, age, and EDSS) or association with the outcome ( $p \leq 0.1$  from  
24  
25 univariate analyses).<sup>31</sup> These potential confounders (measured during the baseline year) included:  
26  
27 all prescriptions dispensed (excluding the MS IMDs), grouped according to the Anatomical  
28  
29 Therapeutic Chemical (ATC) Classification System at the fourth level (i.e. pharmacological  
30  
31 subgroup)<sup>32</sup> and categorized as 0-2; 3-4; 5-6 or  $\geq 7$ , comorbidity status measured using Deyo's  
32  
33 adaptation of the Charlson comorbidity index<sup>33</sup> (categorized as 0 or  $\geq 1$ ), and estimated  
34  
35 neighbourhood SES (expressed as quintiles). All models were adjusted for the time between the  
36  
37 reference and outcome EDSS score.  
38  
39  
40  
41  
42  
43  
44  
45

### 46 47 *Sensitivity and secondary analyses*

48  
49 To fully explore the association between IMD adherence and disability accumulation we  
50  
51 performed several sensitivity analyses and assessed one secondary outcome. For the sensitivity  
52  
53 analyses we first measured disability only over the time period that the subject was 'on drug',  
54  
55 ending follow-up at the last EDSS assessment before the earliest of: IMD discontinuation  
56  
57  
58  
59  
60



Zhang/10

1  
2  
3 (defined as the first day of >180 days with no exposure to a first-line IMD), initiation of a non-  
4 first-line IMD, MS drug clinical trial registration, or December 31, 2008. Second, if multiple  
5 EDSS scores were recorded in a single one-year interval, the lowest, rather than highest, score  
6 was used as the outcome EDSS. Third, we examined the association between early adherence  
7 and disability accumulation in only those subjects with both reference and outcome EDSS scores  
8 recorded for every year between the index date and study end date (i.e. no EDSS scores were  
9 carried forward as reference values). Finally, we examined the association between disability  
10 accumulation and adherence with adherence treated as a continuous variable, categorized into  
11 quartiles, and using a 90% (instead of 80%) threshold for optimal adherence.  
12  
13  
14  
15  
16  
17  
18  
19  
20  
21  
22  
23  
24  
25  
26

27 Our secondary study outcome was time to a confirmed and sustained EDSS score of 6.0. This  
28 outcome, considered as irreversible disability, was achieved when all subsequent EDSS scores  
29 were 6.0 or higher, with at least two records of EDSS 6.0 separated by  $\geq 180$  days, as used  
30 previously.<sup>3</sup> Multivariable Cox proportional hazards models were used to examine the  
31 association between IMD adherence and time to sustained EDSS 6.0, adjusted for potential  
32 confounders (see supplementary methods and Figure S1 for additional details).  
33  
34  
35  
36  
37  
38  
39  
40  
41  
42  
43  
44  
45  
46  
47  
48  
49

50 Statistical analyses were performed using the Statistical Package for the Social Sciences (SPSS),  
51 Version 21.0., IBM Corp. Armonk, NY,<sup>34</sup> and R (Version 3.1.2).<sup>35</sup>  
52  
53  
54  
55  
56  
57  
58  
59  
60

## RESULTS

A total of 801 subjects were included in the primary analyses with a mean age of 41.5 years, a mean disease duration of 9.9 years and a median EDSS of 3.0 at the index date. There were a

1  
2  
3 total of 6,305 person-years of follow-up (mean of 7.9 (SD:2.4) years) (Table 1). Overall, 598  
4  
5 subjects (74.7%) had optimal adherence during the first year of therapy (Figure 1), and 487  
6  
7 (39.0%) met the disability accumulation criterion at least once during follow-up.  
8  
9

10  
11  
12 Socioeconomic status, prescription drug exposure and comorbidity index measures during the  
13  
14 baseline year were not significantly associated with subsequent disability accumulation in the  
15  
16 univariate analyses and were not included in the multivariable models. After adjustment for  
17  
18 baseline sex, age and EDSS, and the amount of time between reference and outcome EDSS  
19  
20 scores, there was no evidence of an association between optimal adherence to a first-line  
21  
22 injectable IMD during the first year of therapy and subsequent disability accumulation [adjusted  
23  
24 odds ratio (adjOR) 0.94; 95% CI 0.78 – 1.15] (Table 2). Compared to women, men were at  
25  
26 greater risk of disability accumulation over the study period (adjOR 1.28 (1.07 – 1.53) (Table 2).  
27  
28  
29  
30  
31  
32  
33

34 Findings from the sensitivity and secondary analyses were consistent with those from the  
35  
36 primary analyses; optimal adherence was not associated with disability accumulation or time to  
37  
38 sustained EDSS 6.0 (adjusted hazard ratio (adjHR) 0.91; 95% CI 0.57 – 1.44) (Tables S1 and S2).  
39  
40 There was also no evidence of an association between optimal adherence and disability  
41  
42 accumulation when adherence was included in the models as a continuous variable, categorized  
43  
44 into quartiles, or with a 90% threshold for optimal adherence (results not shown).  
45  
46  
47  
48  
49

## 50 **DISCUSSION**

51  
52  
53 In this MS cohort, nearly three-quarters of the subjects demonstrated optimal adherence during  
54  
55 the first year of using a first-line injectable IMD therapy. We did not observe a difference in the  
56  
57  
58  
59  
60

Zhang/12

1  
2  
3 odds of disability accumulation for those with optimal IMD adherence in the first year of therapy  
4 compared to those with suboptimal adherence. Similarly, no difference was observed when  
5  
6 disability was assessed as the time to the sustained milestone, EDSS 6.0.  
7  
8  
9

10  
11  
12 Most individuals in our cohort were found to have optimal adherence, which is similar to  
13 adherence levels reported in previous studies.<sup>12, 36</sup> For instance, a study that examined adherence  
14 during the first year of IMD therapy in 2,446 MS patients covered by commercial health plans in  
15 the United States reported that 60% of the cohort had optimal ( $\geq 80\%$ ) adherence.<sup>9</sup> Another  
16 recent study examined adherence in 4,830 individuals with MS using health administrative data  
17 from three provinces in Canada (which included BC). Optimal adherence ( $\geq 80\%$ ) was achieved  
18 in 76% of subjects during the first year of therapy.<sup>36</sup>  
19  
20  
21  
22  
23  
24  
25  
26  
27  
28  
29  
30

31 Previous studies have reported on the effects of IMD adherence on MS patients' quality of life,<sup>10</sup>  
32 medical care costs,<sup>9</sup> and relapse risk,<sup>37</sup> but to our knowledge, no study has examined the  
33 association between IMD adherence and disability accumulation. We did not observe positive  
34 effects of IMD adherence on disability. As it is known that not all individuals respond to beta-  
35 interferon or glatiramer acetate therapy, one potential explanation for this null finding could be  
36 that, optimal adherence is only associated with beneficial effects within certain subgroups of  
37 people with MS. Alternatively, while the first-line injectable IMDs have demonstrated modest  
38 effects on disability accumulation over the short term in clinical trials,<sup>2, 38</sup> it is possible that this  
39 effect does not translate into long-term benefits in real world clinical practice. Although it is not  
40 known how long a person should be on an IMD before gaining benefit, assessment of adherence  
41 over the first year may be insufficient, and may miss non-adherence that occurs after the first  
42  
43  
44  
45  
46  
47  
48  
49  
50  
51  
52  
53  
54  
55  
56  
57  
58  
59  
60

12

1  
2  
3 year, due to needle fatigue for example.<sup>39</sup> We specifically assessed adherence in the first year for  
4  
5 a number of reasons. First, others have shown that this initial window may be of clinical  
6  
7 relevance, predicting future response.<sup>22</sup> Second, this method facilitated a degree of separation  
8  
9 between the exposure (adherence) and outcome (disability accumulation). Finally, previous  
10  
11 studies have shown that early adherence after drug initiation is predictive of later adherence in  
12  
13 some chronic conditions, including MS.<sup>6-8</sup> One recent study from an American managed care  
14  
15 program database found that adherence over the one year period immediately following IMD  
16  
17 initiation predicted adherence over the subsequent year.<sup>6</sup> Similarly, adherence to statins during  
18  
19 the first 4 months after therapy initiation was shown to predict adherence over the subsequent  
20  
21 year in a large North American population.<sup>7</sup>  
22  
23  
24  
25  
26  
27  
28

29 A major strength of this study is the use of a representative sample of individuals with MS in the  
30  
31 'real-world' setting. Although findings from the short-term clinical trials of the first-generation  
32  
33 IMDs demonstrated modest effects on disability accumulation, clinical trials tend to enrol  
34  
35 participants who are highly selected in terms of age, comorbidities and motivation, and employ  
36  
37 strict protocols for clinical monitoring to prevent or mitigate severe adverse events. Thus, trial  
38  
39 participants may not be fully representative of those treated in clinical practice, such that data on  
40  
41 effectiveness and adherence derived from clinical trial participants may not be generalizable to  
42  
43 the wider MS population. Further strengths include study outcomes (EDSS scores) that were  
44  
45 assigned by the treating MS neurologists during clinic visits, and captured prospectively. Also,  
46  
47 our use of prescription dispensations from administrative data to estimate adherence eliminated  
48  
49 the potential for recall bias. Finally, to test the robustness of our main findings, we examined the  
50  
51 association between IMD adherence and disability accumulation using a variety of approaches,  
52  
53  
54  
55  
56  
57  
58  
59  
60

1  
2  
3 including a secondary (alternative) outcome and different methods of categorizing adherence. All  
4  
5 of the findings from these sensitivity analyses confirmed that there was no evidence of an  
6  
7 association between optimal IMD adherence during the first treatment year and subsequent  
8  
9 disability accumulation.  
10  
11

12  
13  
14  
15 There are limitations that should be noted. We cannot be certain that a patient who received a  
16  
17 dispensation for an IMD actually administered the drug. However, given the high cost of IMDs,  
18  
19 the number of patients who actively filled repeated prescriptions for their medications but did not  
20  
21 use them is assumed to be negligible. As with all observational studies, we were not able to  
22  
23 assess all potential confounders; our data did not include information on lifestyle, such as  
24  
25 smoking status or diet, both of which could be associated with IMD adherence and disability  
26  
27 accumulation.<sup>40, 41</sup> However, we were able to account for disability level and comorbidity burden  
28  
29 at baseline, both of which have been linked to IMD adherence and subsequent MS disability  
30  
31 accumulation in previous studies.<sup>41</sup> Finally, we used the EDSS to measure disability  
32  
33 accumulation. While this is a routine clinical measure and the most widely used and  
34  
35 internationally recognized disability assessment tool in MS, it is heavily influenced by  
36  
37 ambulation, and does not adequately capture other common MS symptoms such as cognitive  
38  
39 deficits and fatigue.  
40  
41  
42  
43  
44  
45  
46  
47

48 This is the first study to examine the impact of adherence to the first-line injectable IMDs on  
49  
50 disability accumulation in MS. Among a cohort of incident users of first-line injectable IMDs,  
51  
52 we were unable to find evidence that individuals with MS with optimal adherence during the first  
53  
54 year of therapy were at lower odds of disability accumulation compared to those with suboptimal  
55  
56  
57  
58  
59  
60

1  
2  
3 adherence. However, it remains possible that optimal adherence to IMDs positively affect other  
4  
5 important outcomes for people with MS that were not considered here, such as quality of life and  
6  
7 employment status. Further research examining other relevant MS related outcomes is needed to  
8  
9 fully understand the impact of IMD adherence in MS.  
10  
11  
12  
13  
14  
15  
16  
17  
18  
19  
20  
21  
22  
23  
24  
25  
26  
27  
28  
29  
30  
31  
32  
33  
34  
35  
36  
37  
38  
39  
40  
41  
42  
43  
44  
45  
46  
47  
48  
49  
50  
51  
52  
53  
54  
55  
56  
57  
58  
59  
60

For peer review only

1  
2  
3 **Acknowledgements:** We thank the BC Ministry of Health, BC Vital Statistics Agency and BC  
4  
5  
6  
7  
8  
9  
10  
11  
12  
13  
14  
15  
16  
17  
18  
19  
20  
21  
22  
23  
24  
25  
26  
27  
28  
29  
30  
31  
32  
33  
34  
35  
36  
37  
38  
39  
40  
41  
42  
43  
44  
45  
46  
47  
48  
49  
50  
51  
52  
53  
54  
55  
56  
57  
58  
59  
60  
PharmaNet for approval and support with accessing provincial data; and Population Data BC for  
facilitating approval and use of the data.

**Disclaimer:** All inferences, opinions, and conclusions drawn in this study are those of the  
authors, and do not reflect the opinions or policies of the Data Steward(s).

**Contributorship Statement:** The corresponding author (CE) and the first author (TZ) had  
access to the data in the study and take responsibility for the integrity of the data and accuracy of  
the data analyses. CE, EK, HT and TZ designed the study and CE, HT and RAM obtained  
funding. TZ drafted the manuscript. All authors were involved with the interpretation of the data,  
critically revising the manuscript, and have approved the final version to be published.

**Competing Interests:** Dr. Zhang, Dr. Kingwell and Mr Zhu declare no conflicts. Dr. Petkau  
holds research funding from the Natural Sciences and Engineering Research Council of Canada  
(NSERC), and over the past three years has received consulting fees or fees for service on Data  
Safety Monitoring Boards from the Canadian Study Group on CCSVI, EMD Serono, Novartis,  
and Teva Pharmaceuticals Europe. Dr. Kastrukoff has received honoraria or consultation fees  
from Bayer Healthcare, Biogen Idec, EMD Canada, Genzyme, Merck Serono, Novartis,  
Hoffmann La-Roche, Teva Canada, and unrestricted travel grants to attend scientific meetings  
including: the American Academy of Neurology, American Neurological Association,  
Neuroscience, ECTRIMS, ISNI, and IHW from Bayer Healthcare, BiogenIdec, EMD Serono,  
Hoffmann La-Roche, Novartis, and Teva Canada. Dr Marrie receives research funding from:

1  
2  
3 Canadian Institutes of Health Research, Research Manitoba, Multiple Sclerosis Society of  
4  
5 Canada, Multiple Sclerosis Scientific Foundation, National Multiple Sclerosis Society, Rx & D  
6  
7 Health Research Foundation, Crohn's and Colitis Canada, the Consortium of MS Centers, and  
8  
9 has conducted clinical trials funded by Sanofi-Aventis. Dr. Tremlett is the Canada Research  
10  
11 Chair for Neuroepidemiology and Multiple Sclerosis. She currently receives research support  
12  
13 from the National Multiple Sclerosis Society, the Canadian Institutes of Health Research, the  
14  
15 Multiple Sclerosis Society of Canada and the Multiple Sclerosis Scientific Research Foundation.  
16  
17 In addition, in the last five years she has received research support from the Multiple Sclerosis  
18  
19 Society of Canada (Don Paty Career Development Award); the Michael Smith Foundation for  
20  
21 Health Research (Scholar Award) and the UK MS Trust; speaker honoraria and/or travel  
22  
23 expenses to attend conferences from the Consortium of MS Centres (2013), the National MS  
24  
25 Society (2012, 2014, 2016),ECTRIMS (2012, 2013, 2014, 2015, 2016), the Chesapeake Health  
26  
27 Education Program, US Veterans Affairs (2012), Novartis Canada (2012), Biogen Idec (2014),  
28  
29 American Academy of Neurology (2013, 2014, 2015, 2016). All speaker honoraria are either  
30  
31 declined or donated to an MS charity or to an unrestricted grant for use by her research group.  
32  
33  
34  
35  
36  
37  
38  
39 Dr. Evans declares no conflicts.

40  
41  
42  
43 **Funding:** This study was funding by a National Multiple Sclerosis Society Operating Grant(RG-  
44  
45 4757-A-3). Dr Zhang received a Postdoctoral Fellowship from the Multiple Sclerosis Society of  
46  
47 Canada. The study sponsors had no role in the study design, data collection, data analysis,  
48  
49 interpretation of results, writing of this manuscript, or decision to submit.  
50  
51  
52  
53  
54  
55  
56  
57  
58  
59  
60



Zhang/18

1  
2  
3 **Data Sharing Statement:** Privacy legislation and policies of the British Columbia Ministry of  
4  
5  
6 Health prevent the sharing of data.  
7  
8  
9  
10  
11  
12  
13  
14  
15  
16  
17  
18  
19  
20  
21  
22  
23  
24  
25  
26  
27  
28  
29  
30  
31  
32  
33  
34  
35  
36  
37  
38  
39  
40  
41  
42  
43  
44  
45  
46  
47  
48  
49  
50  
51  
52  
53  
54  
55  
56  
57  
58  
59  
60

For peer review only

## References

1. Leary SM, Porter B, Thompson AJ. Multiple sclerosis: diagnosis and the management of acute relapses. *Postgrad Med J* 2005;81:302-308.
2. Filippini G, Del Giovane C, Vacchi L, et al. Immunomodulators and immunosuppressants for multiple sclerosis: a network meta-analysis. *Cochrane Database Syst Rev* 2013:CD008933.
3. Shirani A, Zhao Y, Karim ME, et al. Association between use of interferon beta and progression of disability in patients with relapsing-remitting multiple sclerosis. *JAMA* 2012;308:247-256.
4. Atlas of MS 2013. Mapping Multiple Sclerosis Around the World. Available at: <https://www.msif.org/wp-content/uploads/2014/09/Atlas-of-MS.pdf> Accessed June 16, 2017.
5. Jimmy B, Jose J. Patient medication adherence: measures in daily practice. *Oman Med J* 2011;26:155-159.
6. Kozma CM, Phillips AL, Meletiche DM. Use of an early disease-modifying drug adherence measure to predict future adherence in patients with multiple sclerosis. *J Manag Care Spec Pharm* 2014;20:800-807.
7. Franklin JM, Krumme AA, Shrank WH, Matlin OS, Brennan TA, Choudhry NK. Predicting adherence trajectory using initial patterns of medication filling. *Am J Manag Care* 2015;21:e537-544.
8. Franklin JM, Shrank WH, Lii J, et al. Observing versus Predicting: Initial Patterns of Filling Predict Long-Term Adherence More Accurately Than High-Dimensional Modeling Techniques. *Health Serv Res* 2016;51:220-239.

- 1  
2  
3 9. Tan H, Cai Q, Agarwal S, Stephenson JJ, Kamat S. Impact of adherence to disease-  
4  
5  
6  
7  
8  
9  
10  
11  
12  
13  
14  
15  
16  
17  
18  
19  
20  
21  
22  
23  
24  
25  
26  
27  
28  
29  
30  
31  
32  
33  
34  
35  
36  
37  
38  
39  
40  
41  
42  
43  
44  
45  
46  
47  
48  
49  
50  
51  
52  
53  
54  
55  
56  
57  
58  
59  
60  
10  
11  
12  
13  
14  
15  
16  
17  
18  
19  
20  
21  
22  
23  
24  
25  
26  
27  
28  
29  
30  
31  
32  
33  
34  
35  
36  
37  
38  
39  
40  
41  
42  
43  
44  
45  
46  
47  
48  
49  
50  
51  
52  
53  
54  
55  
56  
57  
58  
59  
60  
9. Tan H, Cai Q, Agarwal S, Stephenson JJ, Kamat S. Impact of adherence to disease-modifying therapies on clinical and economic outcomes among patients with multiple sclerosis. *Adv Ther* 2011;28:51-61.
10. Kim S, Shin DW, Yun JM, et al. Medication Adherence and the Risk of Cardiovascular Mortality and Hospitalization Among Patients With Newly Prescribed Antihypertensive Medications. *Hypertension* 2016;67:506-512.
11. Krivoy A, Balicer RD, Feldman B, et al. Adherence to antidepressant therapy and mortality rates in ischaemic heart disease: cohort study. *The British journal of psychiatry : the journal of mental science* 2015;206:297-301.
12. Menzin J, Caon C, Nichols C, White LA, Friedman M, Pill MW. Narrative review of the literature on adherence to disease-modifying therapies among patients with multiple sclerosis. *J Manag Care Pharm* 2013;19:S24-40.
13. Devonshire V, Lapierre Y, Macdonell R, et al. The Global Adherence Project (GAP): a multicenter observational study on adherence to disease-modifying therapies in patients with relapsing-remitting multiple sclerosis. *Eur J Neurol* 2011;18:69-77.
14. Kurtzke JF. Rating neurologic impairment in multiple sclerosis: an expanded disability status scale (EDSS). *Neurology* 1983;33:1444-1452.
15. BC Ministry of Health [creator] (2012). PharmaNet. V2. BC Ministry of Health [publisher]. Data Extract. Data Stewardship Committee (2012). <http://www.popdata.bc.ca/data>. Accessed June 17th, 2017 [online].
16. Canadian Institute for Health Information [creator] (2012). Discharge Abstract Database (Hospital Separations). Population Data BC [publisher]. Data Extract. MOH (2012). <http://www.popdata.bc.ca/data>. Accessed June 15th, 2017 [online].

- 1  
2  
3 17. British Columbia Ministry of Health [creator] (2012). Medical Services Plan (MSP)  
4 Payment Information File. V2. Population Data BC [publisher]. Data Extract. MOH (2012).  
5  
6 <http://www.popdata.bc.ca/data>. Accessed June 15th, 2017 [online].  
7  
8
- 9  
10 18. British Columbia Ministry of Health [creator] (2012). Consolidation File (MSP  
11 Registration & Premium Billing). V2. Population Data BC [publisher]. Data Extract. MOH  
12 (2012). <http://www.popdata.bc.ca/data>. Accessed June 17th, 2017 [online].  
13  
14
- 15  
16 19. Wilkins R, Berthelot JM, Ng E. Trends in mortality by neighbourhood income in urban  
17 Canada from 1971 to 1996. *Health Rep* 2002;13 (Suppl):1-27.  
18  
19
- 20  
21 20. Poser CM, Paty DW, Scheinberg L, et al. New diagnostic criteria for multiple sclerosis:  
22 guidelines for research protocols. *Ann Neurol* 1983;13:227-231.  
23  
24
- 25  
26 21. McDonald WI, Compston A, Edan G, et al. Recommended diagnostic criteria for  
27 multiple sclerosis: guidelines from the International Panel on the diagnosis of multiple sclerosis.  
28 *Ann Neurol* 2001;50:121-127.  
29  
30
- 31  
32 22. Rio J, Castillo J, Rovira A, et al. Measures in the first year of therapy predict the response  
33 to interferon beta in MS. *Multiple sclerosis* 2009;15:848-853.  
34  
35
- 36  
37 23. Ho PM, Bryson CL, Rumsfeld JS. Medication adherence: its importance in  
38 cardiovascular outcomes. *Circulation* 2009;119:3028-3035.  
39  
40
- 41  
42 24. Winkelmayr WC, Levin R, Setoguchi S. Associations of kidney function with  
43 cardiovascular medication use after myocardial infarction. *Clin J Am Soc Nephrol* 2008;3:1415-  
44  
45  
46  
47  
48 1422.  
49
- 50  
51 25. Osterberg L, Blaschke T. Adherence to medication. *The New England journal of*  
52  
53  
54  
55  
56  
57  
58  
59  
60  
60 medicine 2005;353:487-497.

- 1  
2  
3  
4  
5  
6  
7  
8  
9  
10  
11  
12  
13  
14  
15  
16  
17  
18  
19  
20  
21  
22  
23  
24  
25  
26  
27  
28  
29  
30  
31  
32  
33  
34  
35  
36  
37  
38  
39  
40  
41  
42  
43  
44  
45  
46  
47  
48  
49  
50  
51  
52  
53  
54  
55  
56  
57  
58  
59  
60
26. Karve S, Cleves MA, Helm M, Hudson TJ, West DS, Martin BC. Good and poor adherence: optimal cut-point for adherence measures using administrative claims data. *Curr Med Res Opin* 2009;25:2303-2310.
27. Giovannoni G, Cook S, Rammohan K, et al. Sustained disease-activity-free status in patients with relapsing-remitting multiple sclerosis treated with cladribine tablets in the CLARITY study: a post-hoc and subgroup analysis. *Lancet Neurol* 2011;10:329-337.
28. Havrdova E, Galetta S, Hutchinson M, et al. Effect of natalizumab on clinical and radiological disease activity in multiple sclerosis: a retrospective analysis of the Natalizumab Safety and Efficacy in Relapsing-Remitting Multiple Sclerosis (AFFIRM) study. *Lancet Neurol* 2009;8:254-260.
29. Rotstein DL, Healy BC, Malik MT, Chitnis T, Weiner HL. Evaluation of no evidence of disease activity in a 7-year longitudinal multiple sclerosis cohort. *JAMA Neurol* 2015;72:152-158.
30. Hanley JA, Negassa A, Edwardes MD, Forrester JE. Statistical analysis of correlated data using generalized estimating equations: an orientation. *Am J Epidemiol* 2003;157:364-375.
31. Hosmer D, Lemeshow S, Sturdivant R. *Applied Logistic Regression* (3rd edn). Wiley: New York, 2013.
32. WHO Collaborating Centre for Drug Statistics Methodology. Guidelines for ATC classification and DDD assignment 2013. Oslo, 2012. [online].
33. Deyo RA, Cherkin DC, Ciol MA. Adapting a clinical comorbidity index for use with ICD-9-CM administrative databases. *J Clin Epidemiol* 1992;45:613-619.
34. IBM Corp. Released 2013. IBM SPSS Statistics for Windows, Version 22.0. Armonk, NY: IBM Corp. Accessed January 29th, 2016. [online].

- 1  
2  
3 35. R Core Team (2016). R: A language and environment for statistical computing. R  
4 Foundation for Statistical Computing, Vienna, Austria. URL <http://www.R-project.org/>.  
5  
6 Accessed on January 29, 2016.  
7  
8  
9  
10 36. Evans C, Marrie RA, Zhu F, et al. Adherence and persistence to drug therapies for  
11 multiple sclerosis: A population-based study. *Mult Scler Relat Disord* 2016;8:78-85.  
12  
13 37. Steinberg SC, Faris RJ, Chang CF, Chan A, Tankersley MA. Impact of adherence to  
14 interferons in the treatment of multiple sclerosis: a non-experimental, retrospective, cohort study.  
15 *Clin Drug Investig* 2010;30:89-100.  
16  
17 38. Tramacere I, Del Giovane C, Salanti G, D'Amico R, Filippini G. Immunomodulators and  
18 immunosuppressants for relapsing-remitting multiple sclerosis: a network meta-analysis.  
19 *Cochrane Database Syst Rev* 2015:CD011381.  
20  
21 39. Remington G, Rodriguez Y, Logan D, Williamson C, Treadaway K. Facilitating  
22 medication adherence in patients with multiple sclerosis. *Int J MS Care* 2013;15:36-45.  
23  
24 40. McKay KA, Tremlett H, Patten SB, et al. Determinants of non-adherence to disease-  
25 modifying therapies in multiple sclerosis: A cross-Canada prospective study. *Multiple sclerosis*  
26 *2017;23:588-596*.  
27  
28 41. McKay KA, Jahanfar S, Duggan T, Tkachuk S, Tremlett H. Factors associated with  
29 onset, relapses or progression in multiple sclerosis: A systematic review. *Neurotoxicology* 2015.  
30  
31  
32  
33  
34  
35  
36  
37  
38  
39  
40  
41  
42  
43  
44  
45  
46  
47  
48  
49  
50  
51  
52  
53  
54  
55  
56  
57  
58  
59  
60

**Table 1.** Characteristics of subjects included in the primary analysis (n=801)

| Characteristics                                   | Descriptive Summaries |
|---------------------------------------------------|-----------------------|
| <i>At the index date (baseline)</i>               |                       |
| Sex, n (%):                                       |                       |
| Males                                             | 192 (24.0)            |
| Females                                           | 609 (76.0)            |
| Age in years, mean (SD)                           | 41.5 (9.5)            |
| <sup>a</sup> Disease duration in years, mean (SD) | 9.9 (8.3)             |
| Initial (index) IMD, n (%):                       |                       |
| Beta-interferon                                   | 713 (89.0)            |
| Glatiramer acetate                                | 88 (11.0)             |
| <i>During the baseline year</i>                   |                       |
| EDSS, median (IQR)                                | 3.0 (2.0 - 4.0)       |
| EDSS, n (%):                                      |                       |
| ≤3                                                | 472 (58.9)            |
| >3 and ≤5.5                                       | 201 (25.1)            |
| ≥6                                                | 128 (16.0)            |
| Concurrent prescription drug classes, n (%):      |                       |
| 0-2                                               | 252 (31.5)            |
| 3-4                                               | 194 (24.2)            |
| 5-≤6                                              | 185 (23.1)            |
| ≥7                                                | 170 (21.2)            |

|                                            |            |
|--------------------------------------------|------------|
| <sup>b</sup> Socioeconomic status, n (%):  |            |
| 1 (lowest)                                 | 130 (16.2) |
| 2                                          | 136 (17.0) |
| 3                                          | 179 (22.3) |
| 4                                          | 164 (20.5) |
| 5 (highest)                                | 168 (21.0) |
| Charlson's comorbidity index score, n (%): |            |
| 0                                          | 729 (91.0) |
| ≥1                                         | 72 (9.0)   |

Abbreviations: EDSS, Expanded Disability Status Scale; IQR, interquartile range.

<sup>a</sup>Disease duration measured from MS symptom onset (recorded in the BCMS database) to the index date (missing for 5 subjects).

<sup>b</sup>Based on neighbourhood income at index (missing for 19 subjects).



**Table 2.** Association between IMD adherence and disability accumulation: results from the GEE models (n=801)

| Factors                                         | Odds Ratios <sup>a</sup> (95% Confidence Intervals) |                        |
|-------------------------------------------------|-----------------------------------------------------|------------------------|
|                                                 | Univariate Analysis                                 | Multivariable Analysis |
| <b>Level of adherence (PDC)</b>                 |                                                     |                        |
| Suboptimal (<80%)                               | 1                                                   | 1                      |
| Optimal (≥80%)                                  | 0.94 (0.78 – 1.13)                                  | 0.94 (0.78 – 1.15)     |
| <b>Sex</b>                                      |                                                     |                        |
| Female                                          | 1                                                   | 1                      |
| Male                                            | 1.28 (1.07 – 1.52)                                  | 1.28 (1.07 – 1.53)     |
| Baseline age, years                             | 1.07 (0.99 – 1.01)                                  | 1.00 (0.99 - 1.01)     |
| Baseline EDSS                                   | 1.03 (0.98 – 1.08)                                  | 1.03 (0.98 – 1.08)     |
| Time (years) between reference and outcome EDSS | 1.41 (1.30 – 1.55)                                  | 1.42 (1.30 - 1.56)     |

Abbreviations: EDSS, Expanded Disability Status Scale; PDC, proportion of days covered

<sup>a</sup>Odds ratio >1 indicates an increased likelihood of disability accumulation.

1  
2  
3  
4  
5  
6  
7  
8  
9  
10  
11  
12  
13  
14  
15  
16  
17  
18  
19  
20  
21  
22  
23  
24  
25  
26  
27  
28  
29  
30  
31  
32  
33  
34  
35  
36  
37  
38  
39  
40  
41  
42  
43  
44  
45  
46  
47  
48  
49  
50  
51  
52  
53  
54  
55  
56  
57  
58  
59  
60

**Figure Legend**

**Figure 1. Distribution of Adherence**

For peer review only

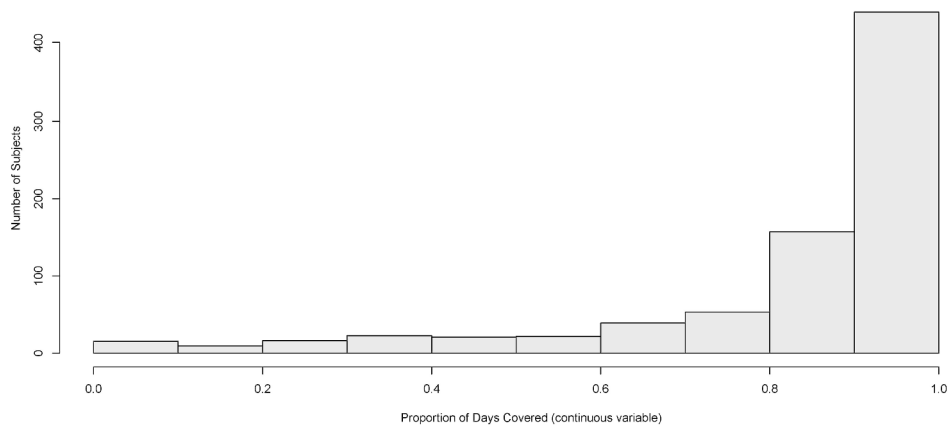

Figure 1. Distribution of Adherence

355x177mm (300 x 300 DPI)

For peer review only

1  
2  
3  
4  
5  
6  
7  
8  
9  
10  
11  
12  
13  
14  
15  
16  
17  
18  
19  
20  
21  
22  
23  
24  
25  
26  
27  
28  
29  
30  
31  
32  
33  
34  
35  
36  
37  
38  
39  
40  
41  
42  
43  
44  
45  
46  
47  
48  
49  
50  
51  
52  
53  
54  
55  
56  
57  
58  
59  
60

## SUPPLEMENTARY MATERIAL

### Additional Methodological Details – Secondary Analysis

For the secondary outcome of time to a confirmed and sustained EDSS score of 6.0, subjects were required to have at least one year of residency in BC following initiation of treatment ('Year 1'). There were additional residency and EDSS related requirements. Subjects were required to have at least two EDSS scores; one recorded during Year 1 (the baseline EDSS) and one after Year 1. For this time-to-event analysis, subjects were followed from the start of Year 2 until either the outcome was reached or the study end (Figure S1b). Adherence was estimated using the proportion of days covered (PDC) during Year 1. If the outcome was not reached, subjects were censored at their last recorded EDSS score, or at the preceding EDSS measurement if the last score was  $\geq 6.0$  and could not be confirmed as sustained.

Potential confounders for the multivariable Cox proportional hazards models included sex, age, EDSS, SES quintile, number of distinct prescription drug classes (fourth level of ATC classification), and Deyo's adaption of the Charlson comorbidity index, all measured during Year 1. Covariates were categorized, and selected for inclusion in the adjusted model, using the same approach as for the primary analyses.

#### *Results from the secondary analysis*

The secondary analysis, examining the association between IMD adherence and time to sustained EDSS 6.0, included 673 MS subjects. Similar to results from the primary analysis,

1  
2  
3 SES, prescription drug exposure and the comorbidity index were not significantly associated  
4 with time to sustained EDSS 6. After adjustment for sex, age, and baseline EDSS, optimal  
5 adherence was not found to be associated with the hazard of reaching sustained EDSS 6.0  
6 (adjusted hazard ratio (adjHR) 0.91; 95% CI 0.57 – 1.44) (Table S1). A shorter time to the  
7 disability outcome was associated with increased age [adjHR 1.02; 95% CI 1.00 – 1.05] and with  
8 higher baseline EDSS [adjHR 1.49; 95% CI 1.33 – 1.68].  
9  
10  
11  
12  
13  
14  
15  
16  
17  
18  
19

### 20 *Results from the sensitivity analyses*

21  
22 A total of 634 subjects were included in the sensitivity analysis, in which the effects of IMD  
23 adherence on disability accumulation were examined only over the period that the subject was  
24 still 'on drug'. Optimal adherence was not associated with disability accumulation (adjusted odds  
25 ratio (adjOR) 1.06; 95% CI 0.81 – 1.39) (Table S2).  
26  
27  
28  
29  
30  
31  
32  
33  
34  
35  
36  
37  
38  
39  
40  
41  
42  
43  
44  
45  
46  
47  
48

49 A total of 801 subjects were included in the sensitivity analysis where the lowest, rather than  
50 highest, score was used as the outcome EDSS when multiple EDSS scores were recorded in a  
51 single one-year interval. Consistent with the primary analysis, optimal adherence was not  
52 associated with disability accumulation (adjOR 1.03; 95% CI 0.84 – 1.26), (Table S2).  
53  
54  
55  
56  
57  
58  
59  
60

When we examined the association between first year adherence and disability accumulation in  
only those subjects with both reference and outcome EDSS scores available for every year  
between the index date and study end date, a total of 703 were included in this analysis.

1  
2  
3  
4  
5  
6  
7  
8  
9  
10  
11  
12  
13  
14  
15  
16  
17  
18  
19  
20  
21  
22  
23  
24  
25  
26  
27  
28  
29  
30  
31  
32  
33  
34  
35  
36  
37  
38  
39  
40  
41  
42  
43  
44  
45  
46  
47  
48  
49  
50  
51  
52  
53  
54  
55  
56  
57  
58  
59  
60

Consistent with previous findings, optimal adherence was not associated with disability accumulation (adjOR 1.12; 95% CI 0.87 – 1.44).

For peer review only

**Table S1.** Association between IMD adherence and disability accumulation: findings based on Cox Proportional Regression analysis of time to sustained EDSS 6 (n=673)

| Factors                         | Hazard Ratios <sup>a</sup> (95% Confidence Intervals) |                                     |
|---------------------------------|-------------------------------------------------------|-------------------------------------|
|                                 | Univariate Analysis                                   | Multivariable Analysis <sup>b</sup> |
| <b>Level of adherence (PDC)</b> |                                                       |                                     |
| ‘Suboptimal’ (<80%)             | 1                                                     | 1                                   |
| ‘Optimal’ (≥80%)                | 0.84 (0.53 – 1.33)                                    | 0.91 (0.57 – 1.44)                  |
| <b>Sex</b>                      |                                                       |                                     |
| Female                          | 1                                                     | 1                                   |
| Male                            | 1.49 (0.97 – 2.31)                                    | 1.20 (0.77 – 1.88)                  |
| <b>Baseline age, years</b>      | 1.03 (1.01 – 1.06)                                    | 1.02 (1.00 – 1.05)                  |
| <b>Baseline EDSS</b>            | 1.53 (1.37 – 1.71)                                    | 1.49 (1.33 – 1.68)                  |

Abbreviations: EDSS, Expanded Disability Status Scale; PDC, proportion of days covered.

<sup>a</sup>Hazard ratio > 1 indicated an increased hazard of disability accumulation.

<sup>b</sup>Model adjusted for age, sex, and baseline EDSS

**Table S2.** Association between IMD adherence and disability accumulation: findings from the three sensitivity analyses

| Factors                                                                                                                                                                                                  | Odds Ratios <sup>a</sup> (95% Confidence Intervals) |                        |
|----------------------------------------------------------------------------------------------------------------------------------------------------------------------------------------------------------|-----------------------------------------------------|------------------------|
|                                                                                                                                                                                                          | Univariate Analysis                                 | Multivariable Analysis |
| <i><sup>b</sup>Analysis 1: Follow-up continued only during exposure to first-line injectable IMDs (n=634)</i>                                                                                            |                                                     |                        |
| Level of adherence (PDC)                                                                                                                                                                                 |                                                     |                        |
| ‘Suboptimal’ (<80%)                                                                                                                                                                                      | 1                                                   | 1                      |
| ‘Optimal’ (≥80%)                                                                                                                                                                                         | 1.04 (0.80 – 1.34)                                  | 1.06 (0.81 – 1.39)     |
| <i><sup>c</sup>Analysis 2: When multiple EDSS scores were available in a given year, the lowest (rather than highest) was selected (n=801)</i>                                                           |                                                     |                        |
| Level of adherence (PDC)                                                                                                                                                                                 |                                                     |                        |
| ‘Suboptimal’ (<80%)                                                                                                                                                                                      | 1                                                   | 1                      |
| ‘Optimal’ (≥80%)                                                                                                                                                                                         | 1.02 (0.84 – 1.23)                                  | 1.03 (0.84 – 1.26)     |
| <i><sup>c</sup>Analysis 3: EDSS scores were not carried forward (only patients with both reference and outcome EDSS scores for every year between the index date and study end were included, n=703)</i> |                                                     |                        |
| Level of adherence (PDC)                                                                                                                                                                                 |                                                     |                        |
| Suboptimal (<80%)                                                                                                                                                                                        | 1                                                   | 1                      |
| Optimal (≥80%)                                                                                                                                                                                           | 1.16 (0.91 – 1.48)                                  | 1.12 (0.87 – 1.44)     |

Abbreviations: EDSS, Expanded Disability Status Scale; PDC, proportion of days covered; IMD, immunomodulatory drug.



1  
2  
3 Each model was adjusted for sex, baseline age, baseline EDSS, and time between the reference  
4 and outcome EDSS.  
5  
6

7  
8 <sup>a</sup>OR>1 indicated an increased likelihood of disability accumulation; hazard ratio >1 indicated an  
9 increased hazard of disability accumulation.  
10  
11

12  
13 <sup>b</sup>Analysis 1: Subjects were followed until the last available EDSS before: first-line IMD  
14 discontinuation, initiation of a non-first line IMD, MS drug clinical trial registration, or  
15 December 31, 2008. There were 167 fewer subjects included in this sensitivity analysis  
16 compared to the primary analysis because these individuals discontinued their first-line  
17 injectable IMD before the start of Year 2 (i.e. no follow-up EDSS assessments were available  
18 prior to drug discontinuation).  
19  
20  
21  
22  
23  
24  
25  
26  
27

28  
29 <sup>c</sup>Analysis 3: There were 98 fewer subjects included compared to the primary analysis because  
30 these individuals did not have at least one EDSS score available in each one year interval  
31 between the index date and the study end date.  
32  
33  
34  
35  
36  
37  
38  
39  
40  
41  
42  
43  
44  
45  
46  
47  
48  
49  
50  
51  
52  
53  
54  
55  
56  
57  
58  
59  
60

**Figure S1.** Measurement of the study exposure (adherence) and outcomes (disability accumulation and the sustained disability milestone, EDSS 6.0)

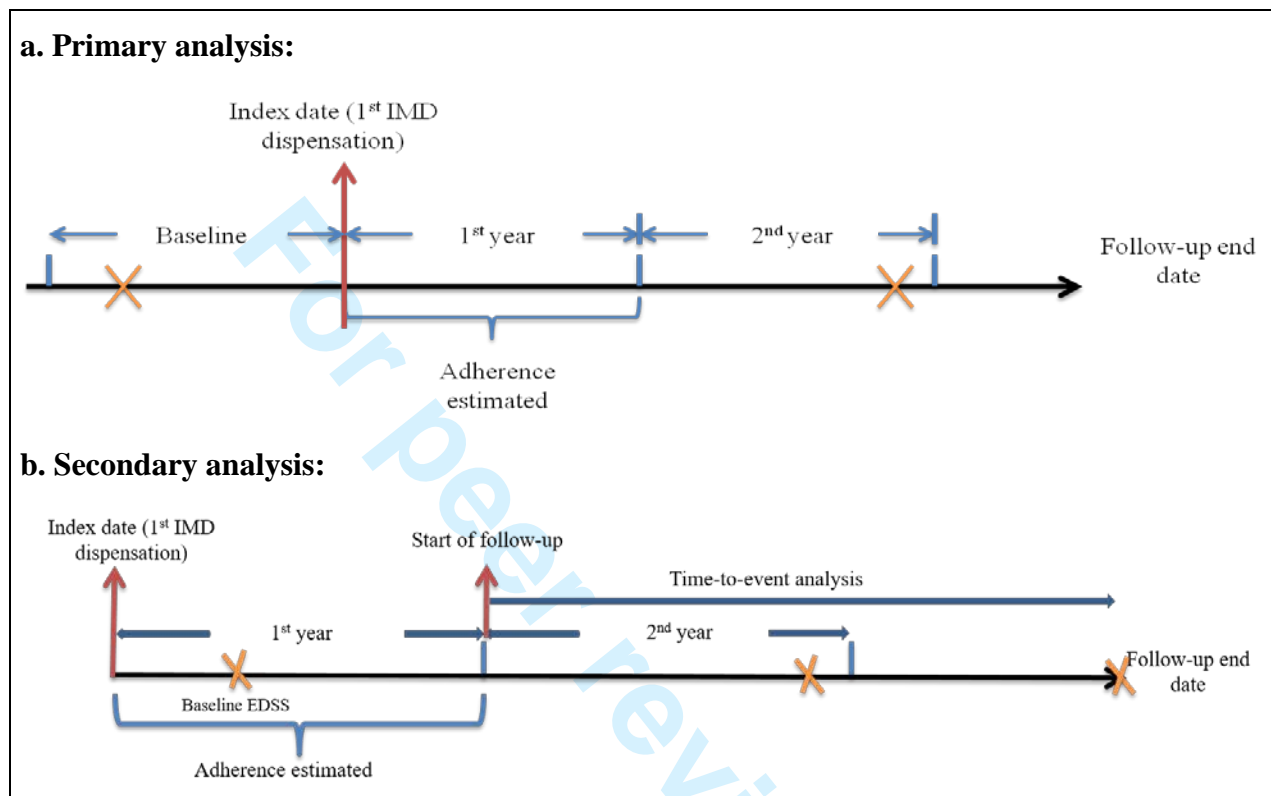

Notes:

X indicates a recorded EDSS score.

Subjects were followed from their index date (date of the first IMD dispensation) until the last available EDSS score recorded prior to the study end.

- a. For the primary analysis, adherence was measured during Year 1. EDSS scores were examined during each one-year interval from Year 2 onwards to determine if disability accumulation had occurred (yes/no) relative to the previous year (the reference interval). The effects of IMD adherence on subsequent disability accumulation were examined using generalized estimating equations.

1  
2  
3 If no EDSS score was available during the reference interval, the EDSS score from the most  
4 recent interval (including the baseline year) with a recorded EDSS score was used as the  
5 reference. In Figure 1a, for example, as an EDSS score was not available during Year 1, the  
6 baseline EDSS served as the reference for the EDSS score during Year 2.  
7  
8  
9  
10  
11

- 12  
13 b. For the secondary analysis, adherence was measured during Year 1. Time from the beginning  
14 of Year 2 (start of follow-up) to a confirmed and sustained EDSS score of 6.0 was modeled  
15 using multivariable Cox proportional hazards regression models, which were adjusted for sex  
16 and age at the start of Year 2, and Year 1 (baseline) EDSS. In the situation where a patient  
17 reached EDSS 6.0 at their last assessment, but this was not confirmed by another score of  
18 EDSS  $\geq$  6.0 after at least 180 days, the patient was censored at the preceding EDSS  
19 assessment.  
20  
21  
22  
23  
24  
25  
26  
27  
28  
29  
30  
31  
32  
33  
34  
35  
36  
37  
38  
39  
40  
41  
42  
43  
44  
45  
46  
47  
48  
49  
50  
51  
52  
53  
54  
55  
56  
57  
58  
59  
60

## STROBE Statement—checklist of items that should be included in reports of observational studies

|                              | Item No                      | Recommendation                                                                                                                                                                                                                                                                                                                                                                                                                                                                                                                                                                                                                                                                                       |
|------------------------------|------------------------------|------------------------------------------------------------------------------------------------------------------------------------------------------------------------------------------------------------------------------------------------------------------------------------------------------------------------------------------------------------------------------------------------------------------------------------------------------------------------------------------------------------------------------------------------------------------------------------------------------------------------------------------------------------------------------------------------------|
| <b>Title and abstract</b>    | Pg<br>1,3                    | (a) Indicate the study's design with a commonly used term in the title or the abstract<br><br>(b) Provide in the abstract an informative and balanced summary of what was done and what was found                                                                                                                                                                                                                                                                                                                                                                                                                                                                                                    |
| <b>Introduction</b>          |                              |                                                                                                                                                                                                                                                                                                                                                                                                                                                                                                                                                                                                                                                                                                      |
| Background/rationale         | Pg<br>5                      | Explain the scientific background and rationale for the investigation being reported                                                                                                                                                                                                                                                                                                                                                                                                                                                                                                                                                                                                                 |
| Objectives                   | Pg<br>5                      | State specific objectives, including any prespecified hypotheses                                                                                                                                                                                                                                                                                                                                                                                                                                                                                                                                                                                                                                     |
| <b>Methods</b>               |                              |                                                                                                                                                                                                                                                                                                                                                                                                                                                                                                                                                                                                                                                                                                      |
| Study design                 | Pg<br>6                      | Present key elements of study design early in the paper                                                                                                                                                                                                                                                                                                                                                                                                                                                                                                                                                                                                                                              |
| Setting                      | Pg<br>6-7                    | Describe the setting, locations, and relevant dates, including periods of recruitment, exposure, follow-up, and data collection                                                                                                                                                                                                                                                                                                                                                                                                                                                                                                                                                                      |
| Participants                 | Pg<br>7-8                    | (a) <i>Cohort study</i> —Give the eligibility criteria, and the sources and methods of selection of participants. Describe methods of follow-up<br><i>Case-control study</i> —Give the eligibility criteria, and the sources and methods of case ascertainment and control selection. Give the rationale for the choice of cases and controls<br><i>Cross-sectional study</i> —Give the eligibility criteria, and the sources and methods of selection of participants<br><br>(b) <i>Cohort study</i> —For matched studies, give matching criteria and number of exposed and unexposed<br><i>Case-control study</i> —For matched studies, give matching criteria and the number of controls per case |
| Variables                    | Pg<br>7-10                   | Clearly define all outcomes, exposures, predictors, potential confounders, and effect modifiers. Give diagnostic criteria, if applicable                                                                                                                                                                                                                                                                                                                                                                                                                                                                                                                                                             |
| Data sources/<br>measurement | Pg<br>7-10                   | For each variable of interest, give sources of data and details of methods of assessment (measurement). Describe comparability of assessment methods if there is more than one group                                                                                                                                                                                                                                                                                                                                                                                                                                                                                                                 |
| Bias                         | Pg<br>13                     | Describe any efforts to address potential sources of bias                                                                                                                                                                                                                                                                                                                                                                                                                                                                                                                                                                                                                                            |
| Study size                   | Pg<br>7                      | Explain how the study size was arrived at<br>We were limited to the number of subjects registered in the MS clinics who met the eligibility criteria                                                                                                                                                                                                                                                                                                                                                                                                                                                                                                                                                 |
| Quantitative variables       | Pg<br>9<br>Supp<br>Materials | Explain how quantitative variables were handled in the analyses. If applicable, describe which groupings were chosen and why<br>Also see Supplementary Materials                                                                                                                                                                                                                                                                                                                                                                                                                                                                                                                                     |
| Statistical methods          | Pg<br>9<br>Supp<br>Materials | (a) Describe all statistical methods, including those used to control for confounding<br><br>(b) Describe any methods used to examine subgroups and interactions<br><br>(c) Explain how missing data were addressed<br><br>(d) <i>Cohort study</i> —If applicable, explain how loss to follow-up was addressed                                                                                                                                                                                                                                                                                                                                                                                       |

1  
2 *Case-control study*—If applicable, explain how matching of cases and controls  
3 was addressed

4 *Cross-sectional study*—If applicable, describe analytical methods taking  
5 account of sampling strategy

6  
7 Also see Supplementary Materials

8 (g) Describe any sensitivity analyses

9 Continued on next page

10  
11  
12  
13  
14  
15  
16  
17  
18  
19  
20  
21  
22  
23  
24  
25  
26  
27  
28  
29  
30  
31  
32  
33  
34  
35  
36  
37  
38  
39  
40  
41  
42  
43  
44  
45  
46  
47  
48  
49  
50  
51  
52  
53  
54  
55  
56  
57  
58  
59  
60

For peer review only

**Results**

|                  |                                          |                                                                                                                                                                                                                                                                                                                                                                                                                       |
|------------------|------------------------------------------|-----------------------------------------------------------------------------------------------------------------------------------------------------------------------------------------------------------------------------------------------------------------------------------------------------------------------------------------------------------------------------------------------------------------------|
| Participants     | Pg<br>10-11                              | (a) Report numbers of individuals at each stage of study—eg numbers potentially eligible, examined for eligibility, confirmed eligible, included in the study, completing follow-up, and analysed<br><br>(b) Give reasons for non-participation at each stage<br><br>(c) Consider use of a flow diagram                                                                                                               |
| Descriptive data | Pg<br>10-11<br>Table 1                   | (a) Give characteristics of study participants (eg demographic, clinical, social) and information on exposures and potential confounders<br><br>(b) Indicate number of participants with missing data for each variable of interest<br><br>(c) <i>Cohort study</i> —Summarise follow-up time (eg, average and total amount)                                                                                           |
| Outcome data     | Pg<br>11<br>Supp<br>Materials            | <i>Cohort study</i> —Report numbers of outcome events or summary measures over time<br><br><i>Case-control study</i> —Report numbers in each exposure category, or summary measures of exposure<br><br><i>Cross-sectional study</i> —Report numbers of outcome events or summary measures                                                                                                                             |
| Main results     | Pg<br>11<br>Table 2<br>Supp<br>Materials | (a) Give unadjusted estimates and, if applicable, confounder-adjusted estimates and their precision (eg, 95% confidence interval). Make clear which confounders were adjusted for and why they were included<br><br>(b) Report category boundaries when continuous variables were categorized<br><br>(c) If relevant, consider translating estimates of relative risk into absolute risk for a meaningful time period |
| Other analyses   | Supp<br>Materials                        | Report other analyses done—eg analyses of subgroups and interactions, and sensitivity analyses                                                                                                                                                                                                                                                                                                                        |

**Discussion**

|                  |             |                                                                                                                                                                            |
|------------------|-------------|----------------------------------------------------------------------------------------------------------------------------------------------------------------------------|
| Key results      | Pg<br>11-12 | Summarise key results with reference to study objectives                                                                                                                   |
| Limitations      | Pg<br>14    | Discuss limitations of the study, taking into account sources of potential bias or imprecision. Discuss both direction and magnitude of any potential bias                 |
| Interpretation   | Pg<br>14    | Give a cautious overall interpretation of results considering objectives, limitations, multiplicity of analyses, results from similar studies, and other relevant evidence |
| Generalisability | Pg<br>13    | Discuss the generalisability (external validity) of the study results                                                                                                      |

**Other information**

|         |          |                                                                                                                                                               |
|---------|----------|---------------------------------------------------------------------------------------------------------------------------------------------------------------|
| Funding | Pg<br>16 | Give the source of funding and the role of the funders for the present study and, if applicable, for the original study on which the present article is based |
|---------|----------|---------------------------------------------------------------------------------------------------------------------------------------------------------------|

\*Give information separately for cases and controls in case-control studies and, if applicable, for exposed and unexposed groups in cohort and cross-sectional studies.

**Note:** An Explanation and Elaboration article discusses each checklist item and gives methodological background and published examples of transparent reporting. The STROBE checklist is best used in conjunction with this article (freely available on the Web sites of PLoS Medicine at <http://www.plosmedicine.org/>, Annals of Internal Medicine at <http://www.annals.org/>, and Epidemiology at <http://www.epidem.com/>). Information on the STROBE Initiative is available at [www.strobe-statement.org](http://www.strobe-statement.org).
